# Supplementary material
Source: PubMed Central journal article supplement (PMC2424193)

**MALDI-TOF mass spectra of identified proteins for “Chemical rescue of  $\Delta$ F508-CFTR mimics Genetic Repair in Cystic Fibrosis Bronchial Epithelial Cells”, Singh, O.V. et al.**

# IP-1: Glucose regulated protein 94 kDa/ TRA1

Voyager Spec #1=>NR(2.00)=>BC[BP = 1839.5, 11125]

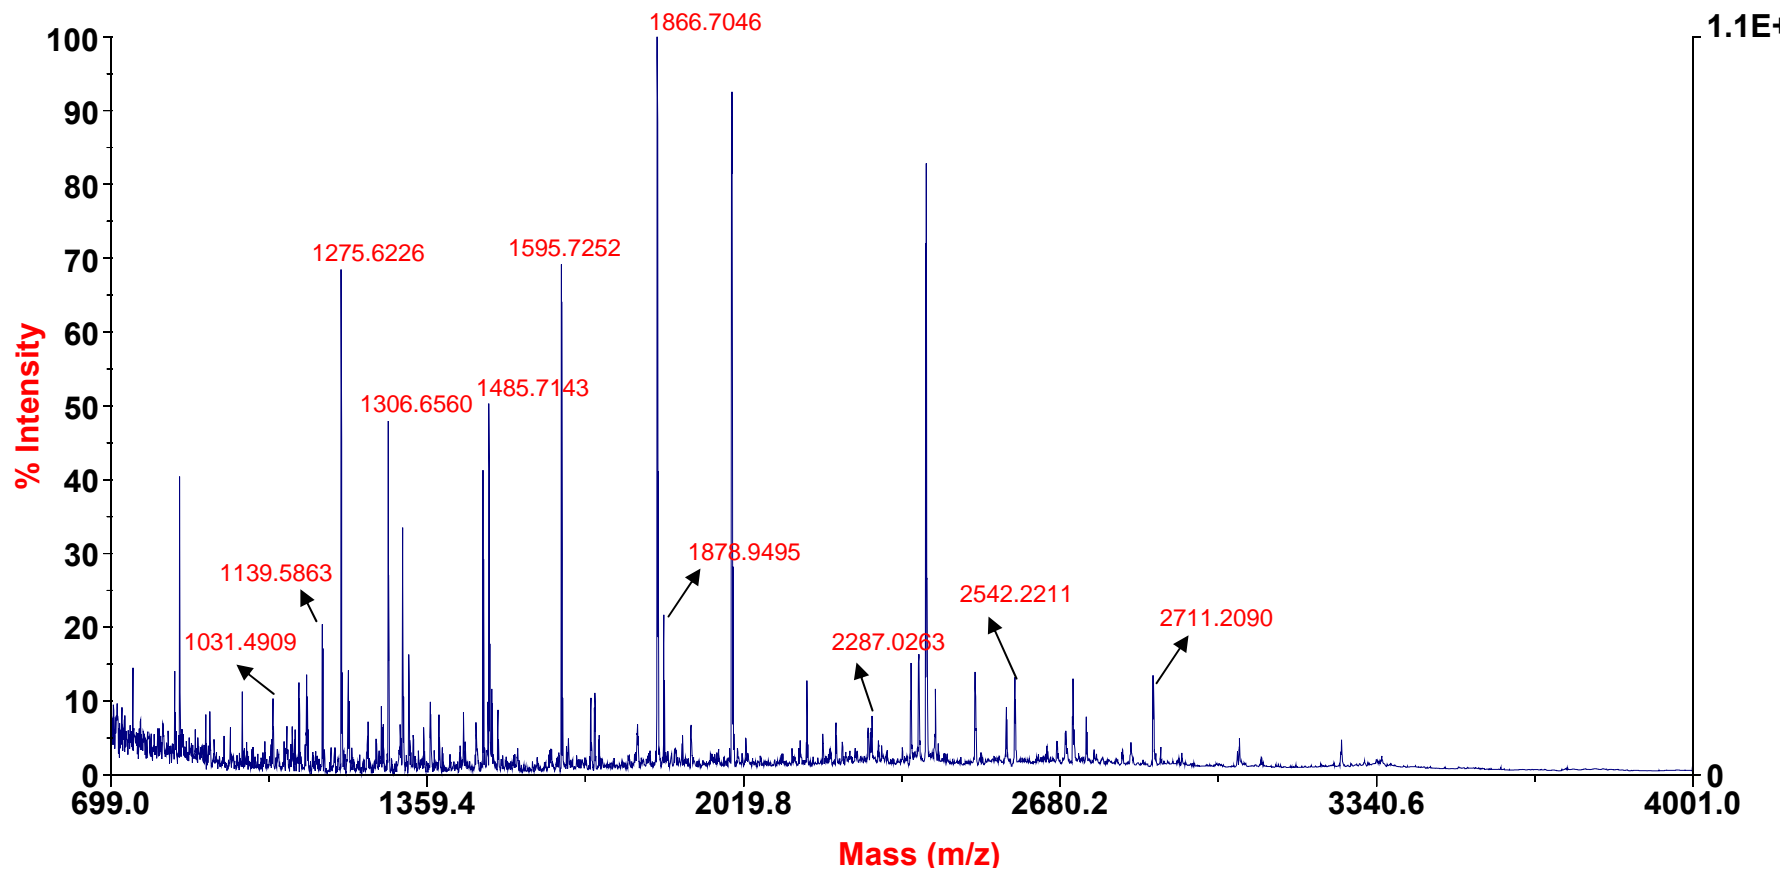

# IP-2: Heat shock protein 84 kDa / HSPCB (Mod)

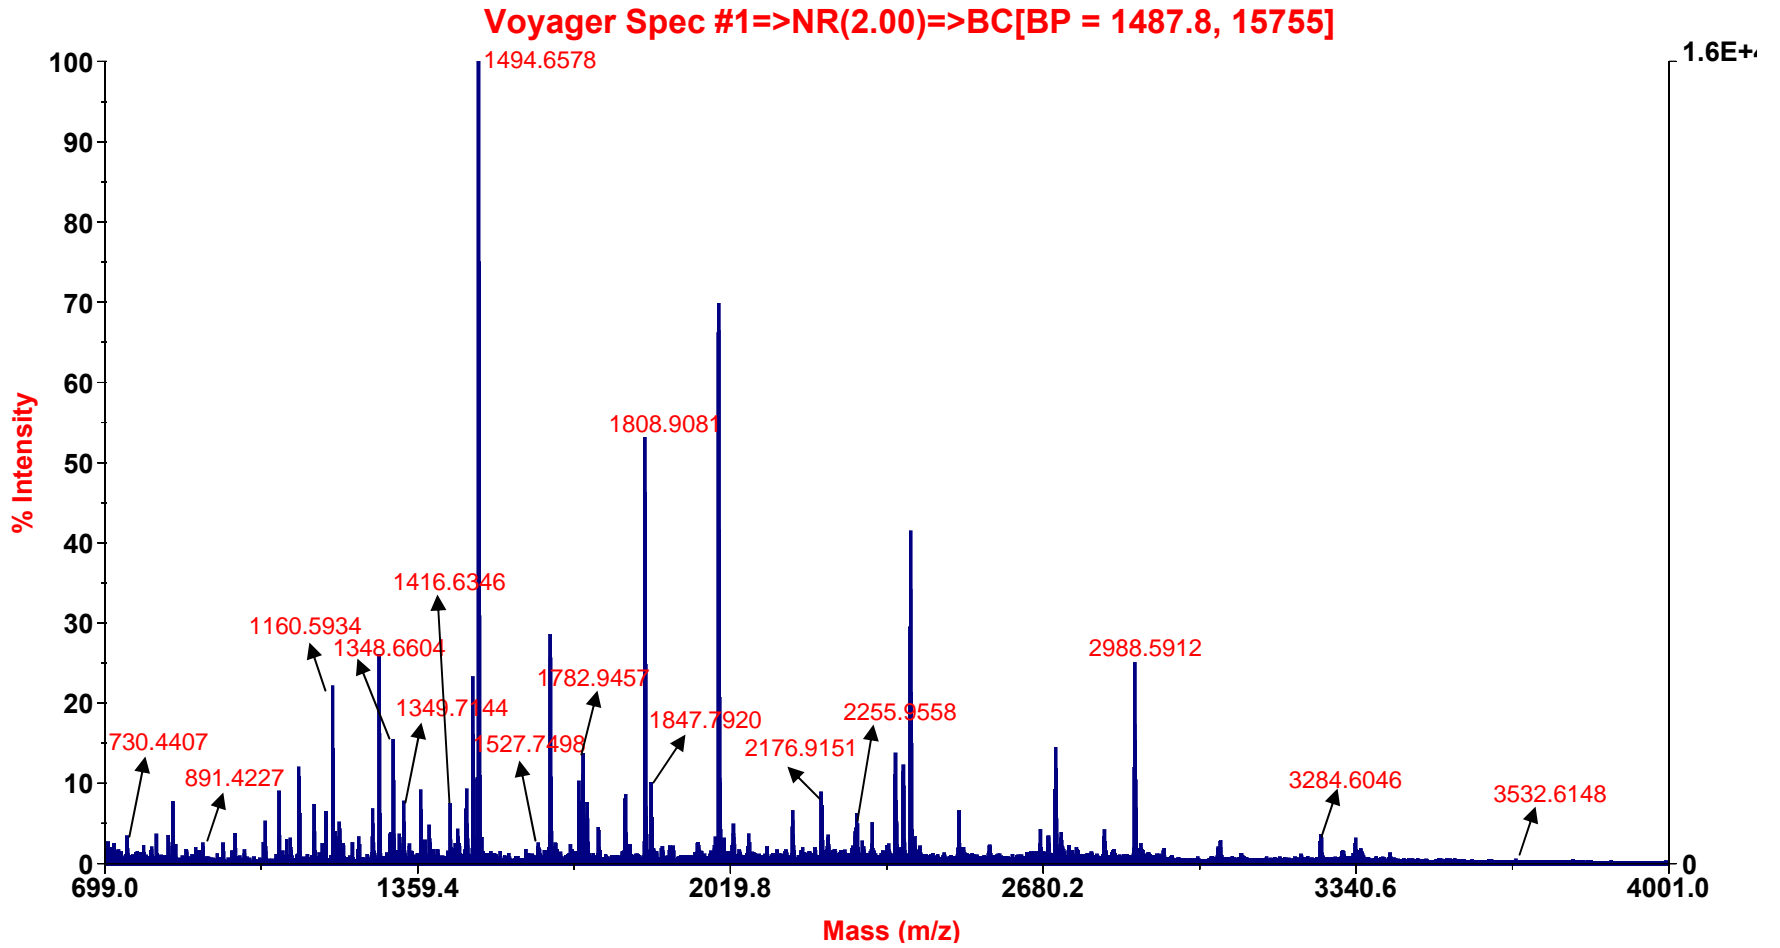

# IP-3: Glucose regulated protein 78 kDa (BiP)/ HSPA5

Voyager Spec #1=>NR(2.00)=>BC[BP = 1934.3, 11830]

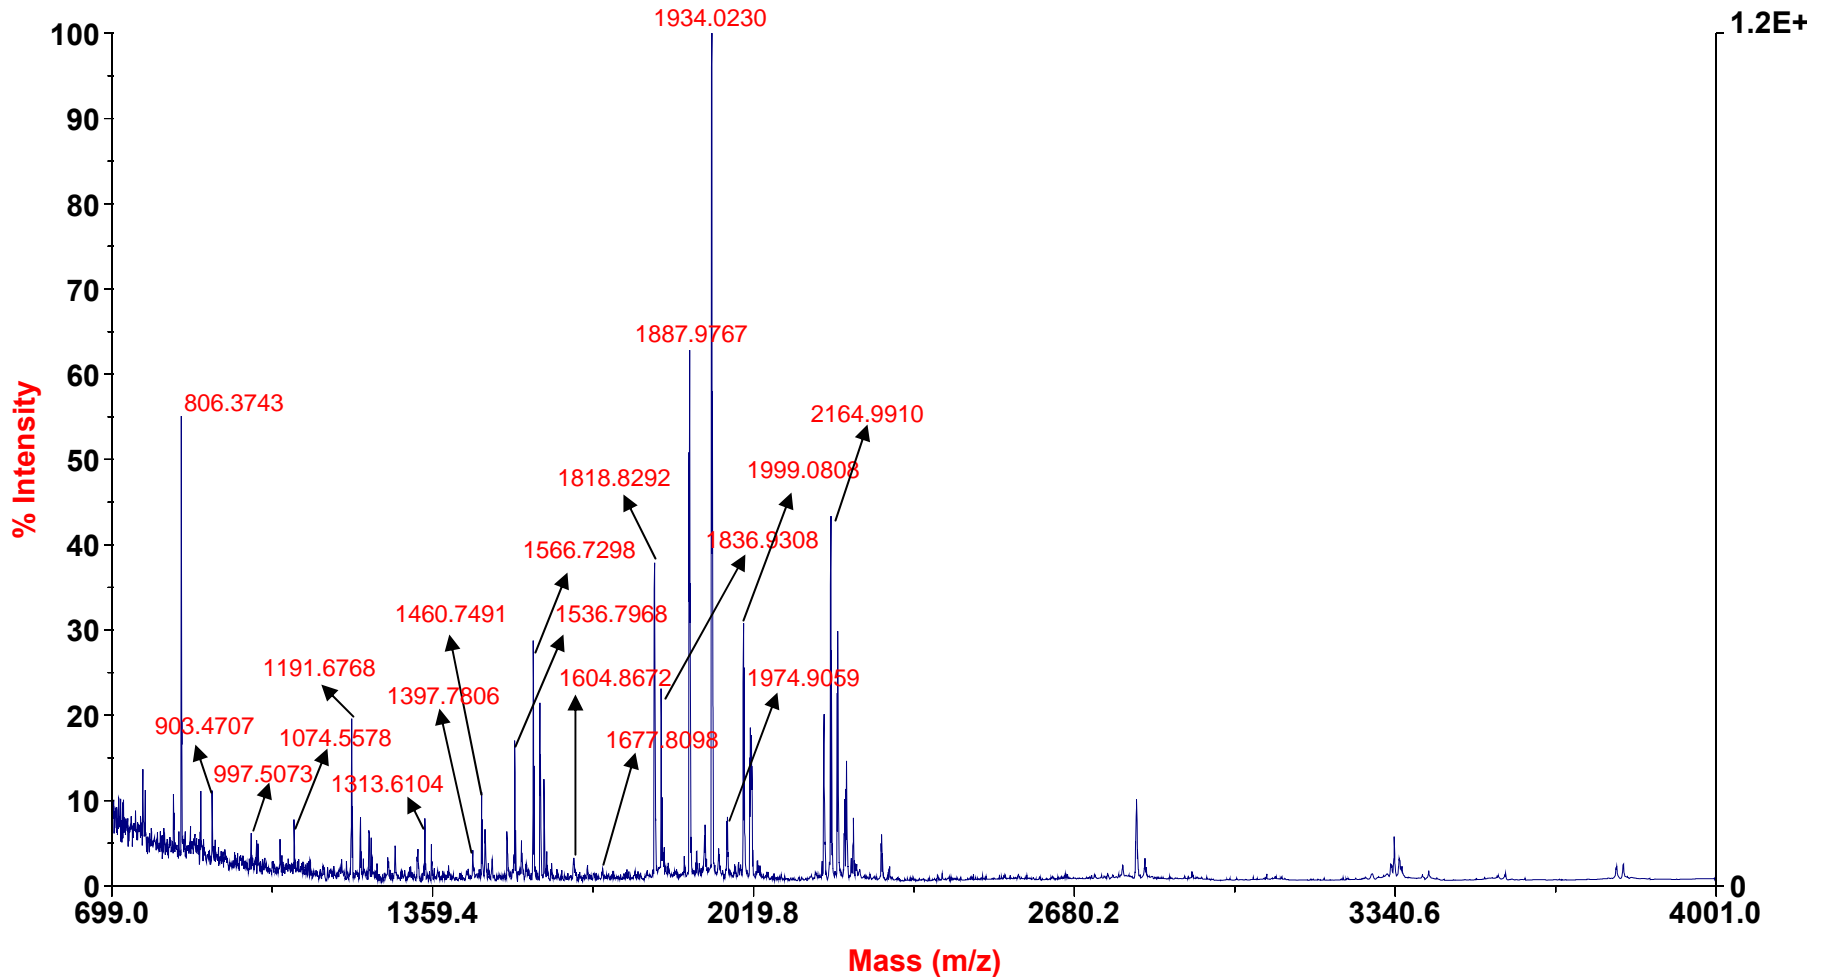

# IP-4: dnaK-type molecular chaperone/ HSPA1

Voyager Spec #1=>NR(2.00)=>BC[BP = 1401.0, 25746]

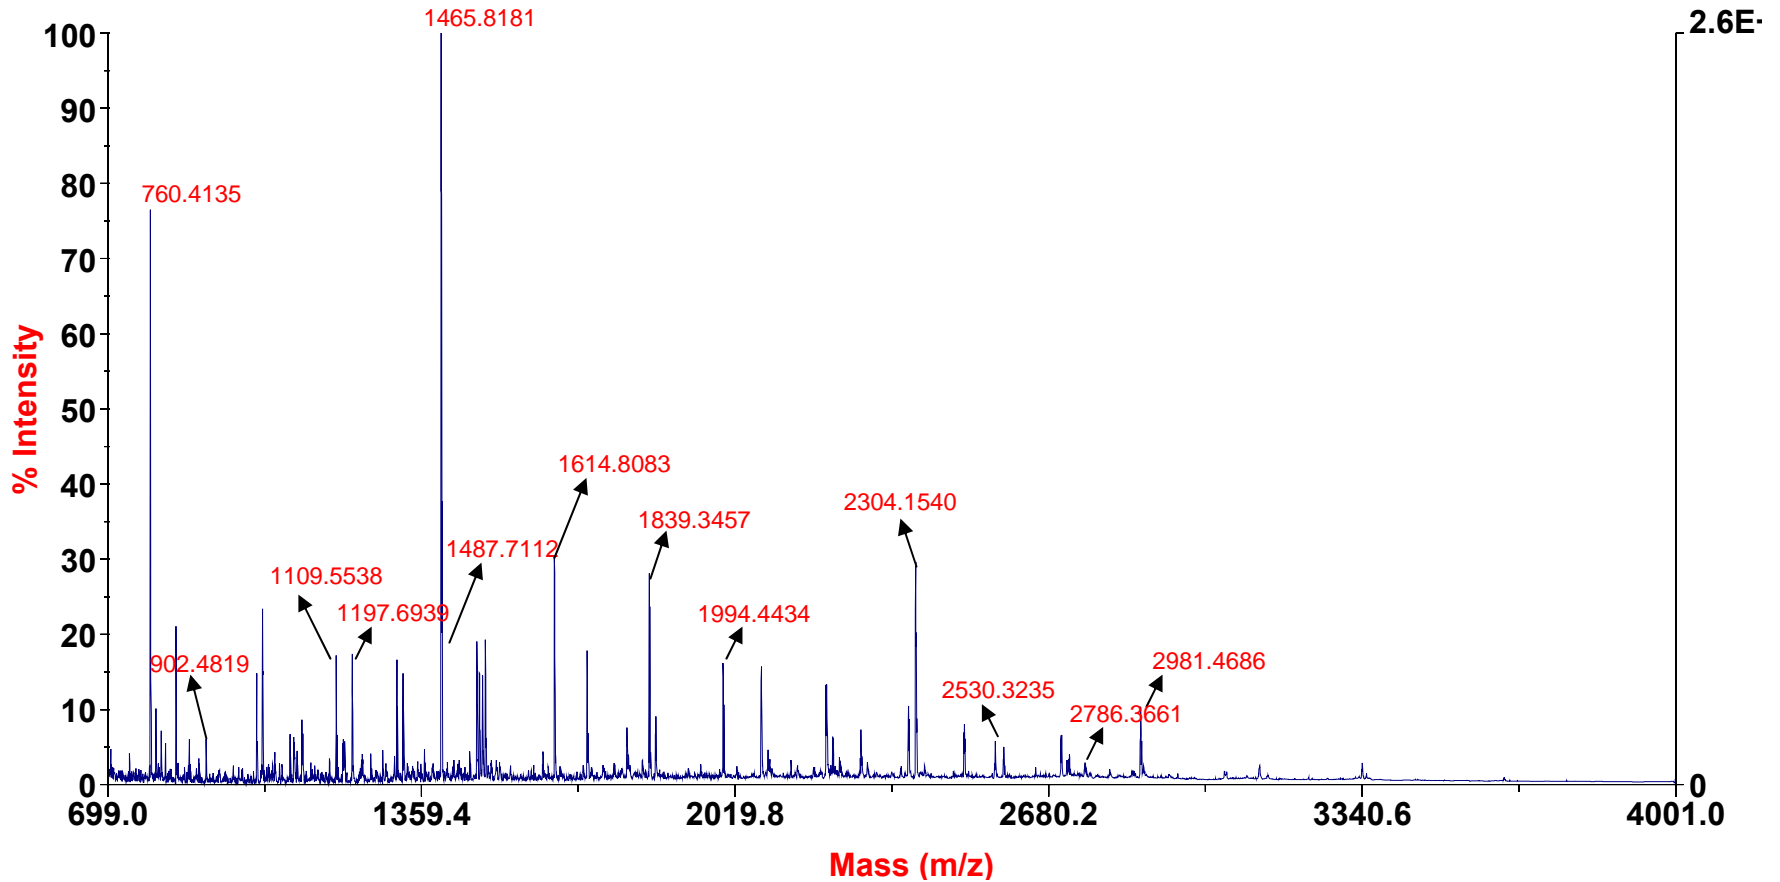

# IP-5: Heat shock 70 kDa protein 2/ HSPA2

Voyager Spec #1=>NR(2.00)=>BC[BP = 842.8, 6183]

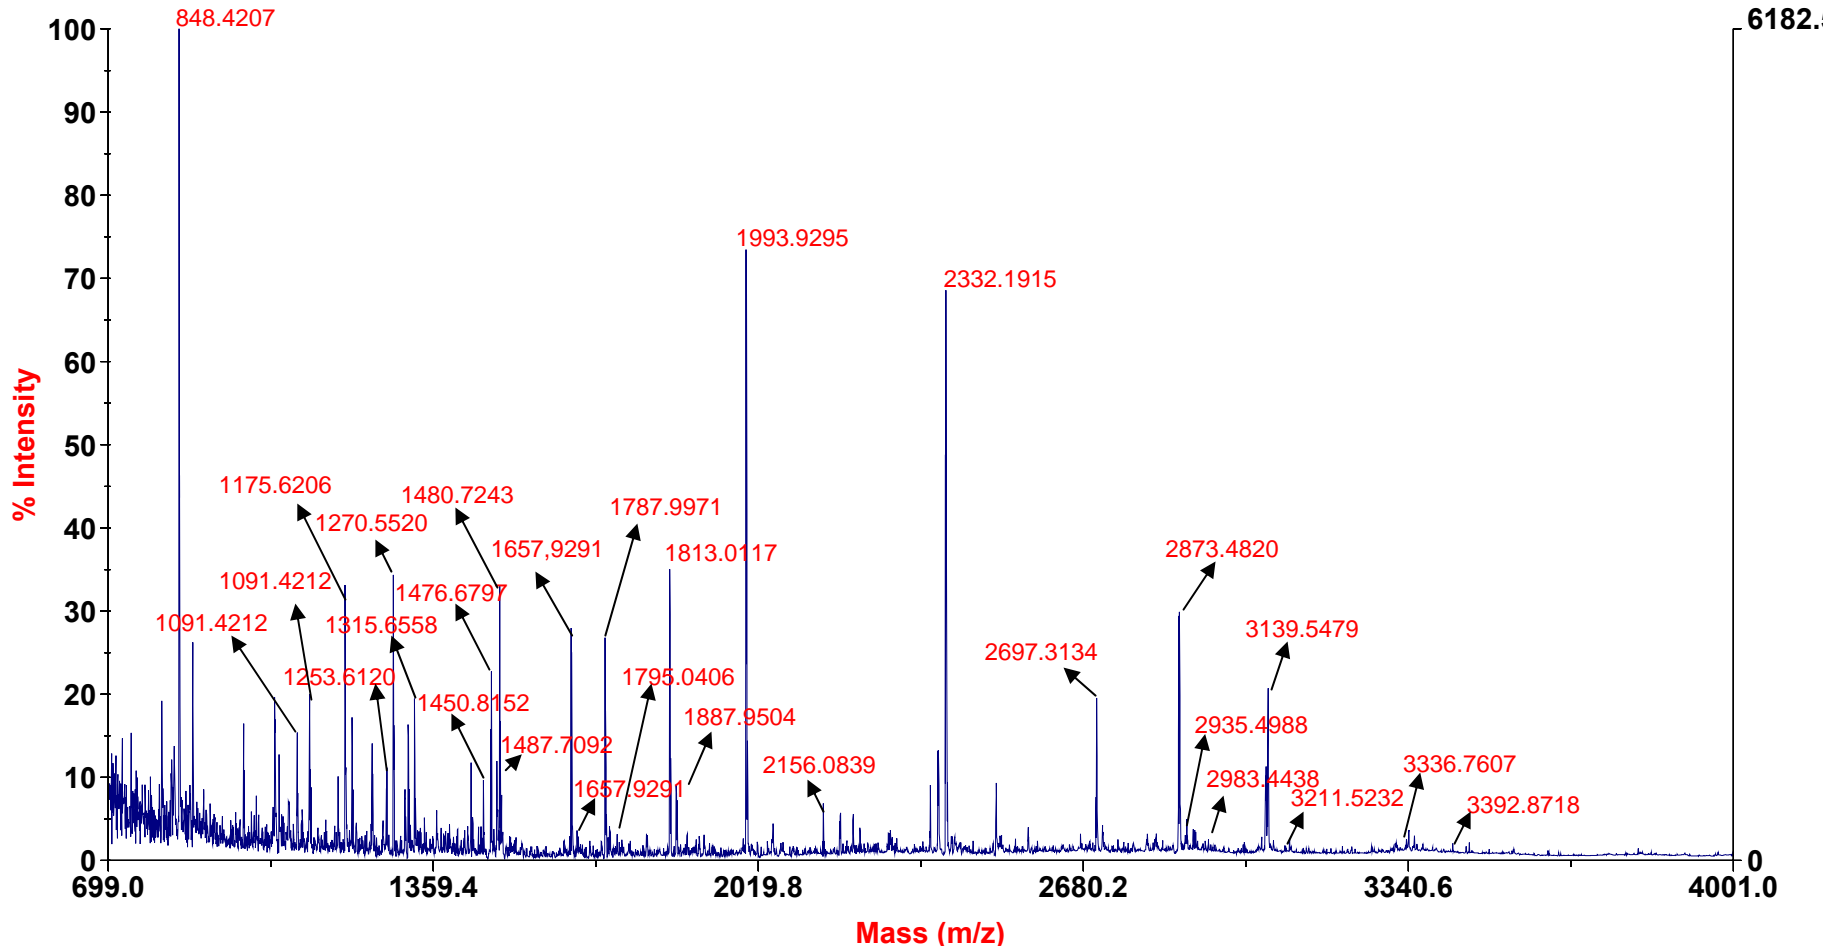

# IP-6: Heat shock 60 kDa Protein 1/ HSPD1

Voyager Spec #1=>NR(2.00)=>BC[BP = 1684.6, 22593]

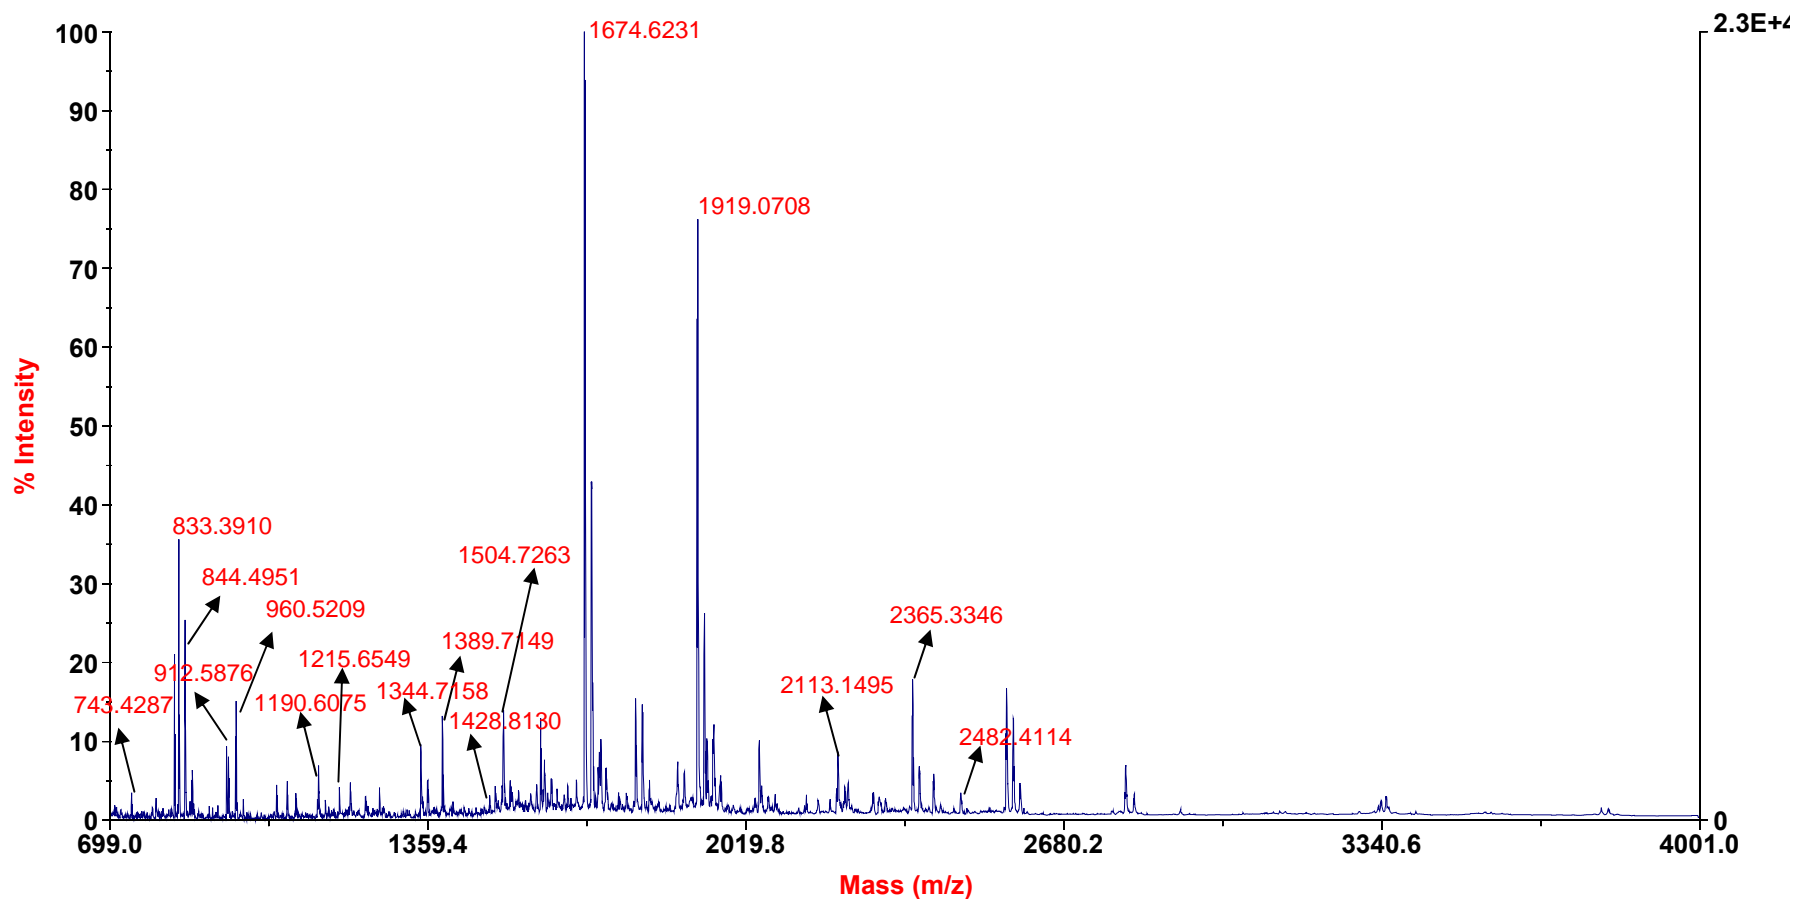

# IP-7: Glucose regulated protein 75 kDa/ MTHSP75

Voyager Spec #1=>NR(2.00)=>BC[BP = 637.6, 8393]

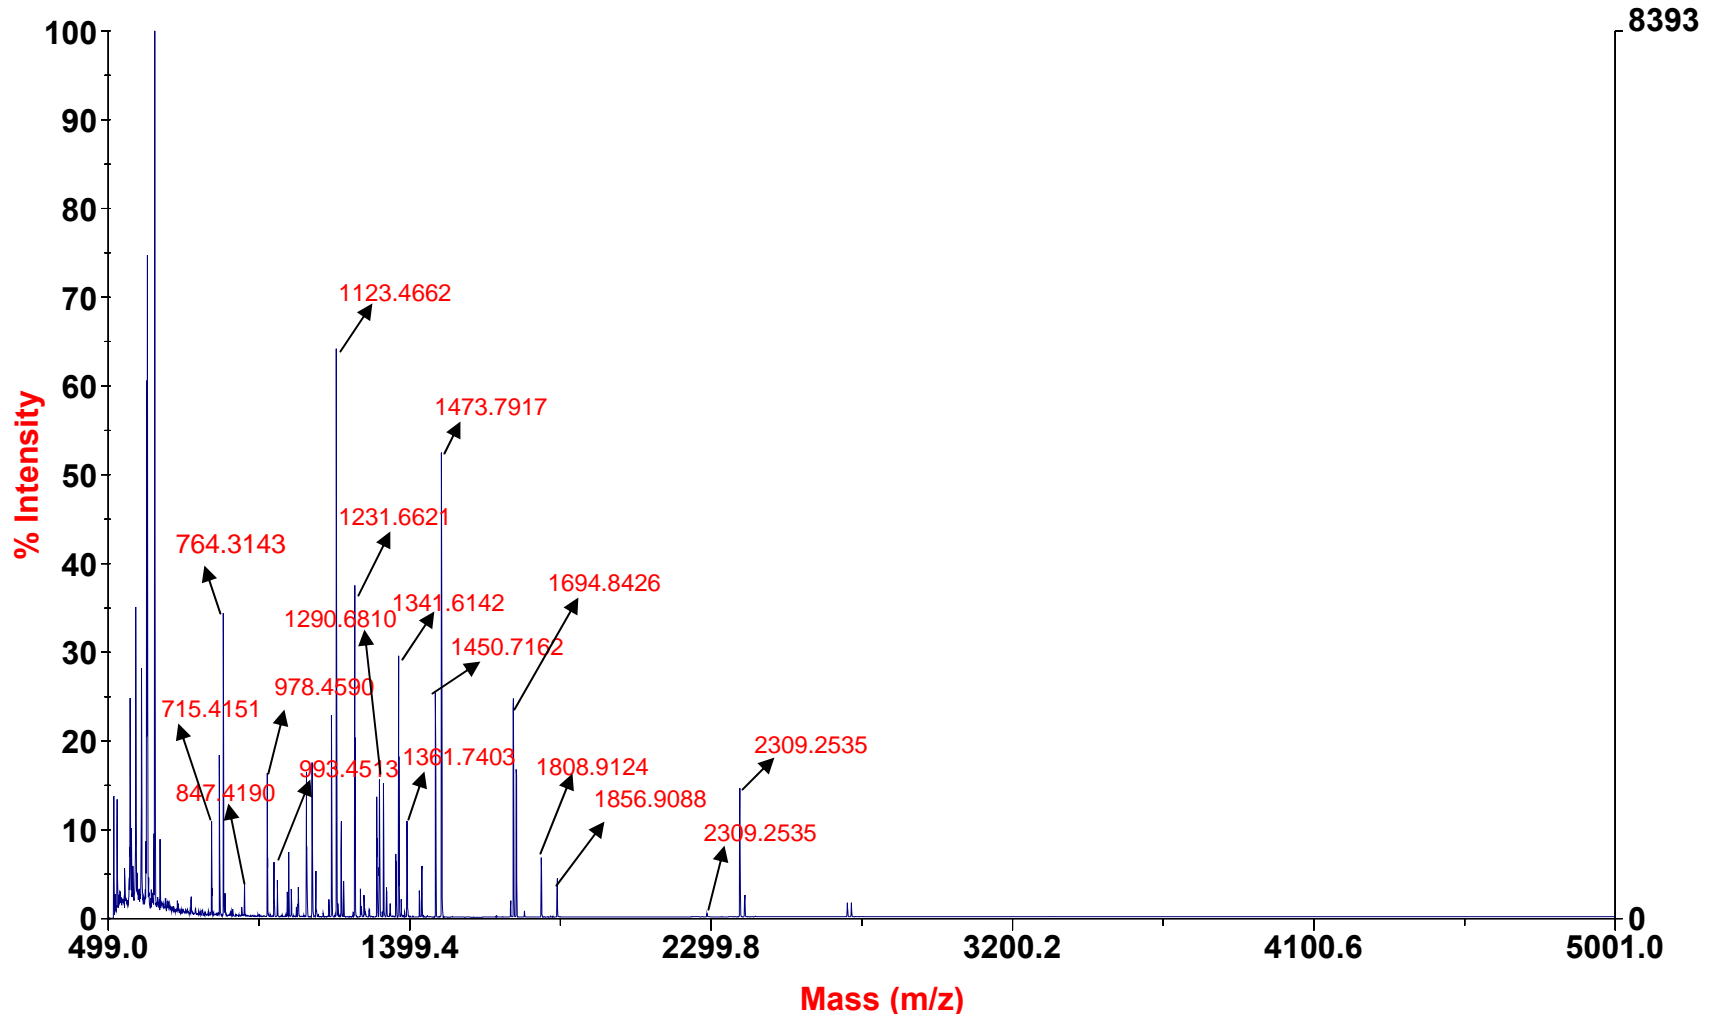



# IP-8: Heat shock 70 kDa protein 1-HOM/ HSP-HOM

Voyager Spec #1=>NR(4.00)=>BC[BP = 1684.6, 22429]

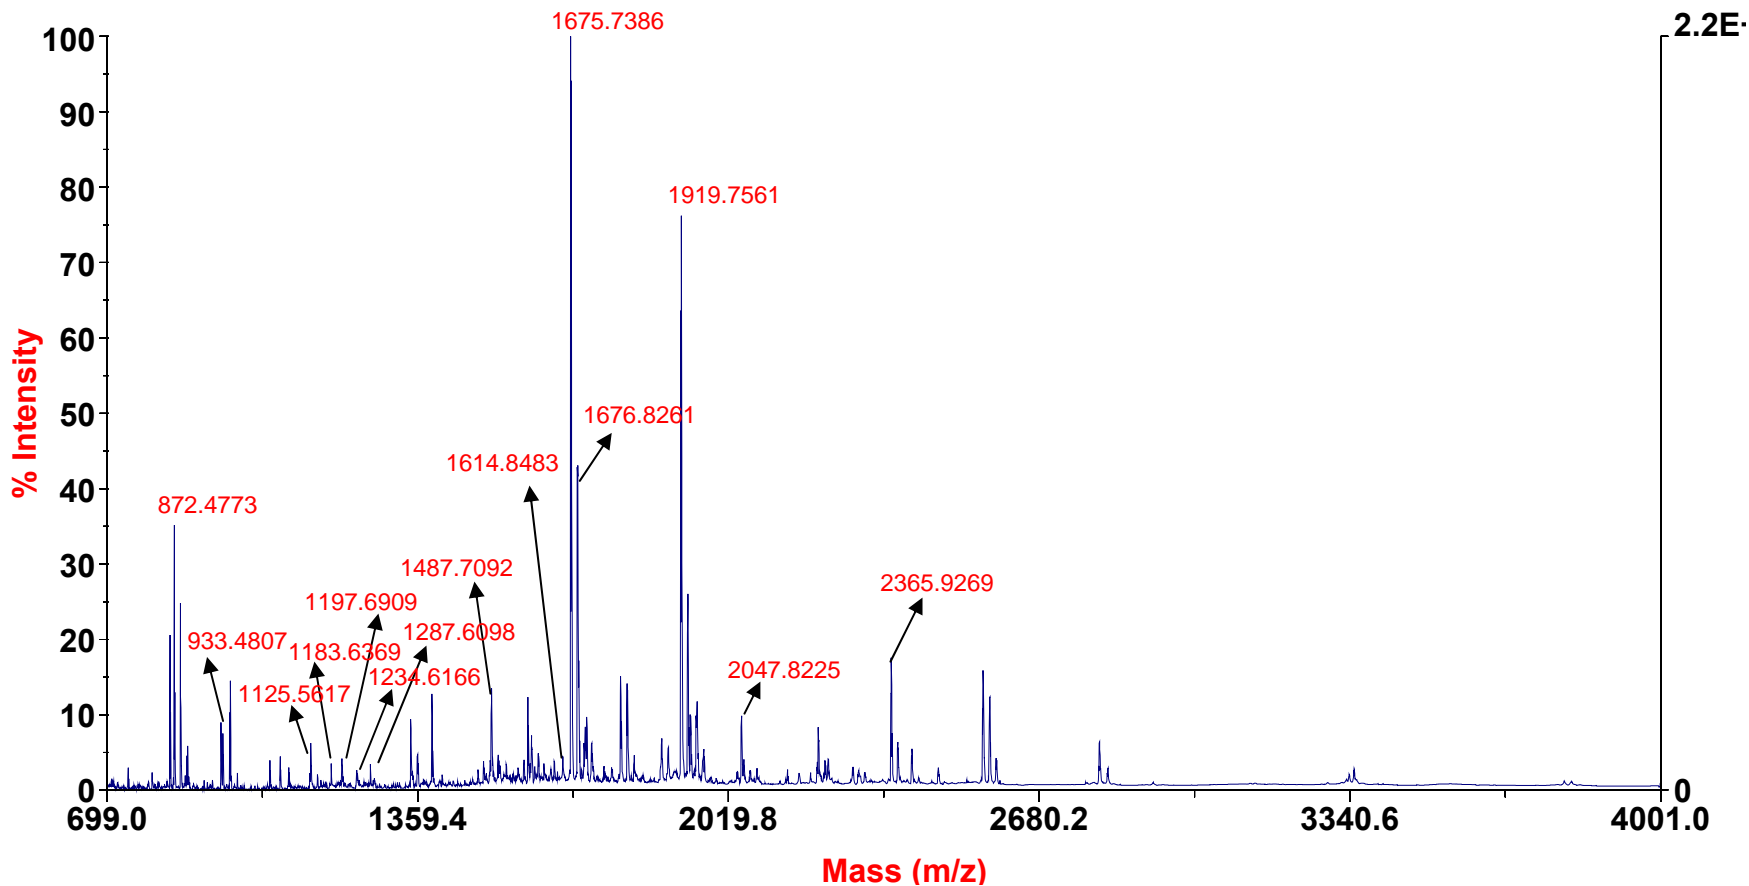

# IP-9: Glucose regulated protein 58 kDa/ PDIA3

Voyager Spec #1=>NR(2.00)=>BC[BP = 1180.0, 45255]

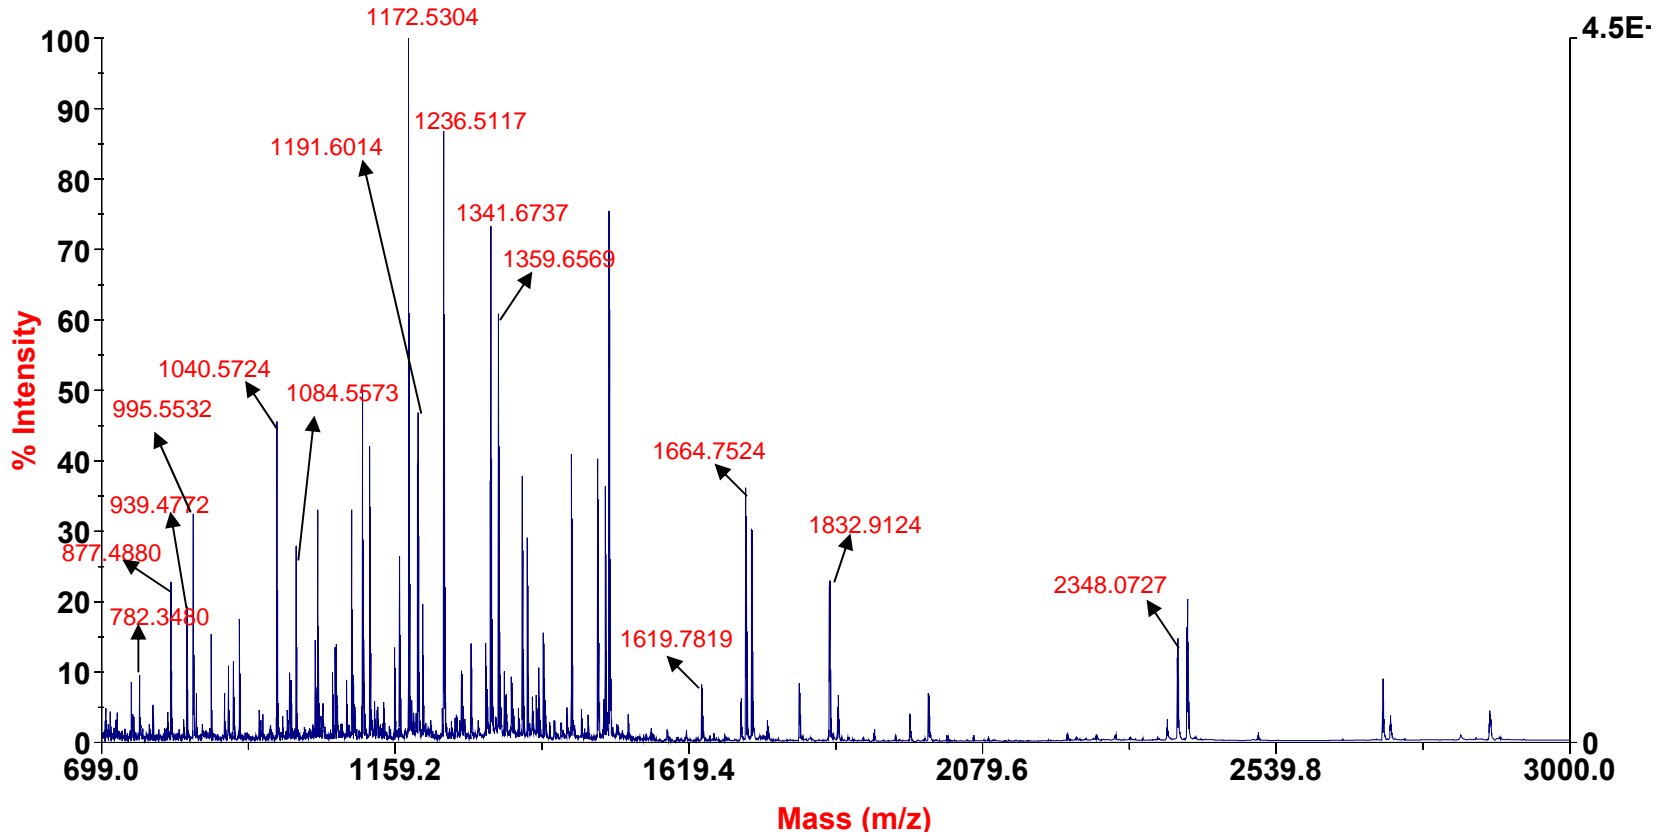

# IP-10: Heat shock cognate protein 8 isoform 1, 71 kDa/ HSPA8

Voyager Spec #1=>NR(2.00)=>BC[BP = 614.7, 58599]

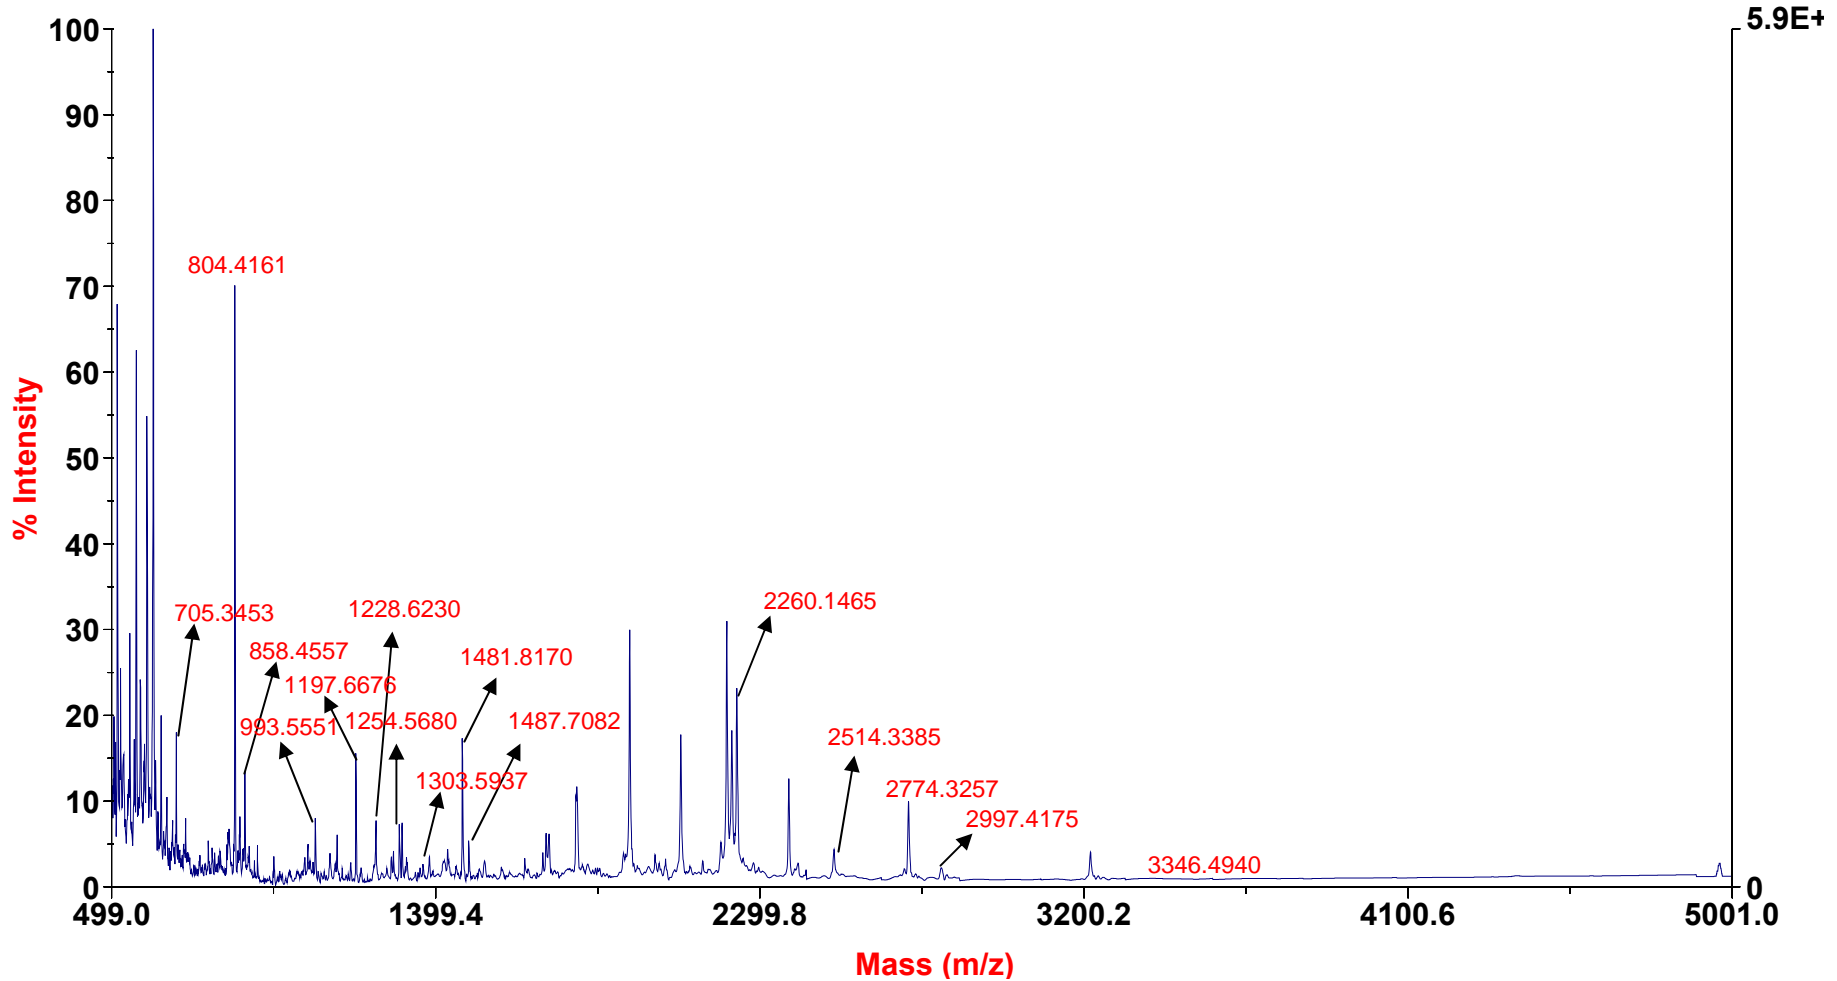

# IP-11: BAG-3

Voyager Spec #1=>NR(2.00)=>BC[BP = 581.0, 1334]

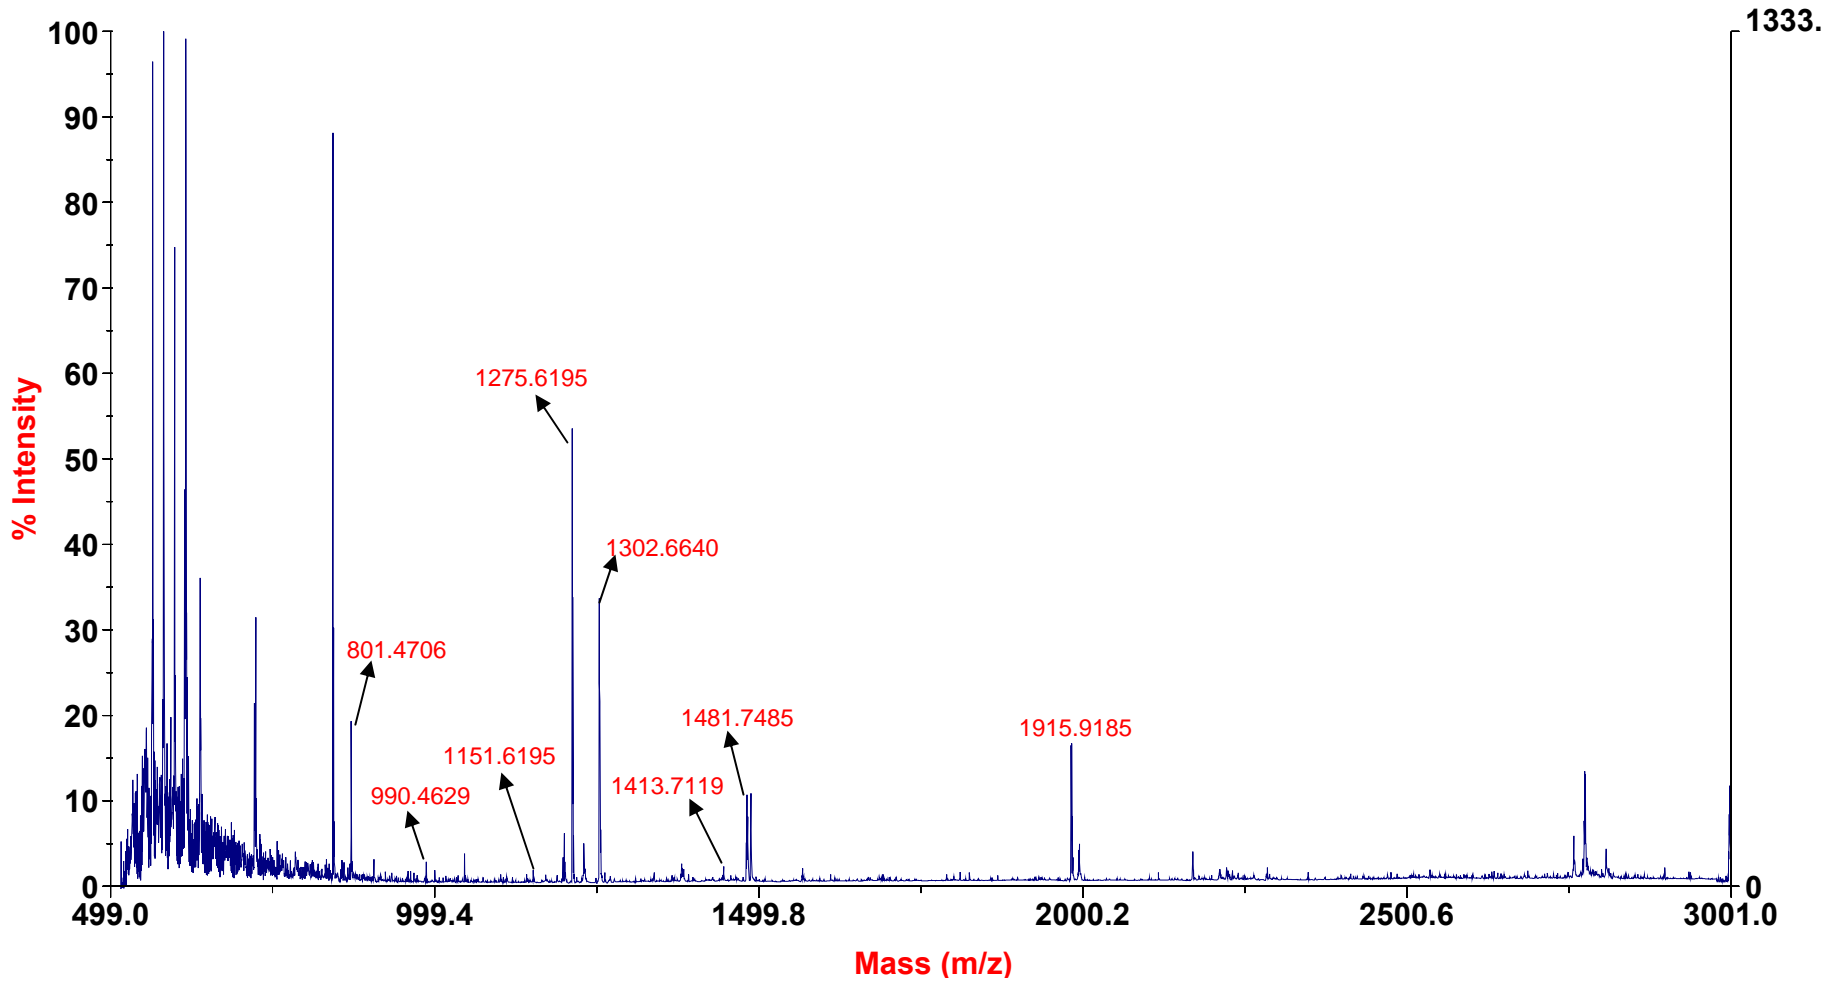

# IP-12: $\alpha$ -tubulin isoform 1/ TUBA1B

Voyager Spec #1=>NR(2.00)=>BC[BP = 1718.7, 23845]

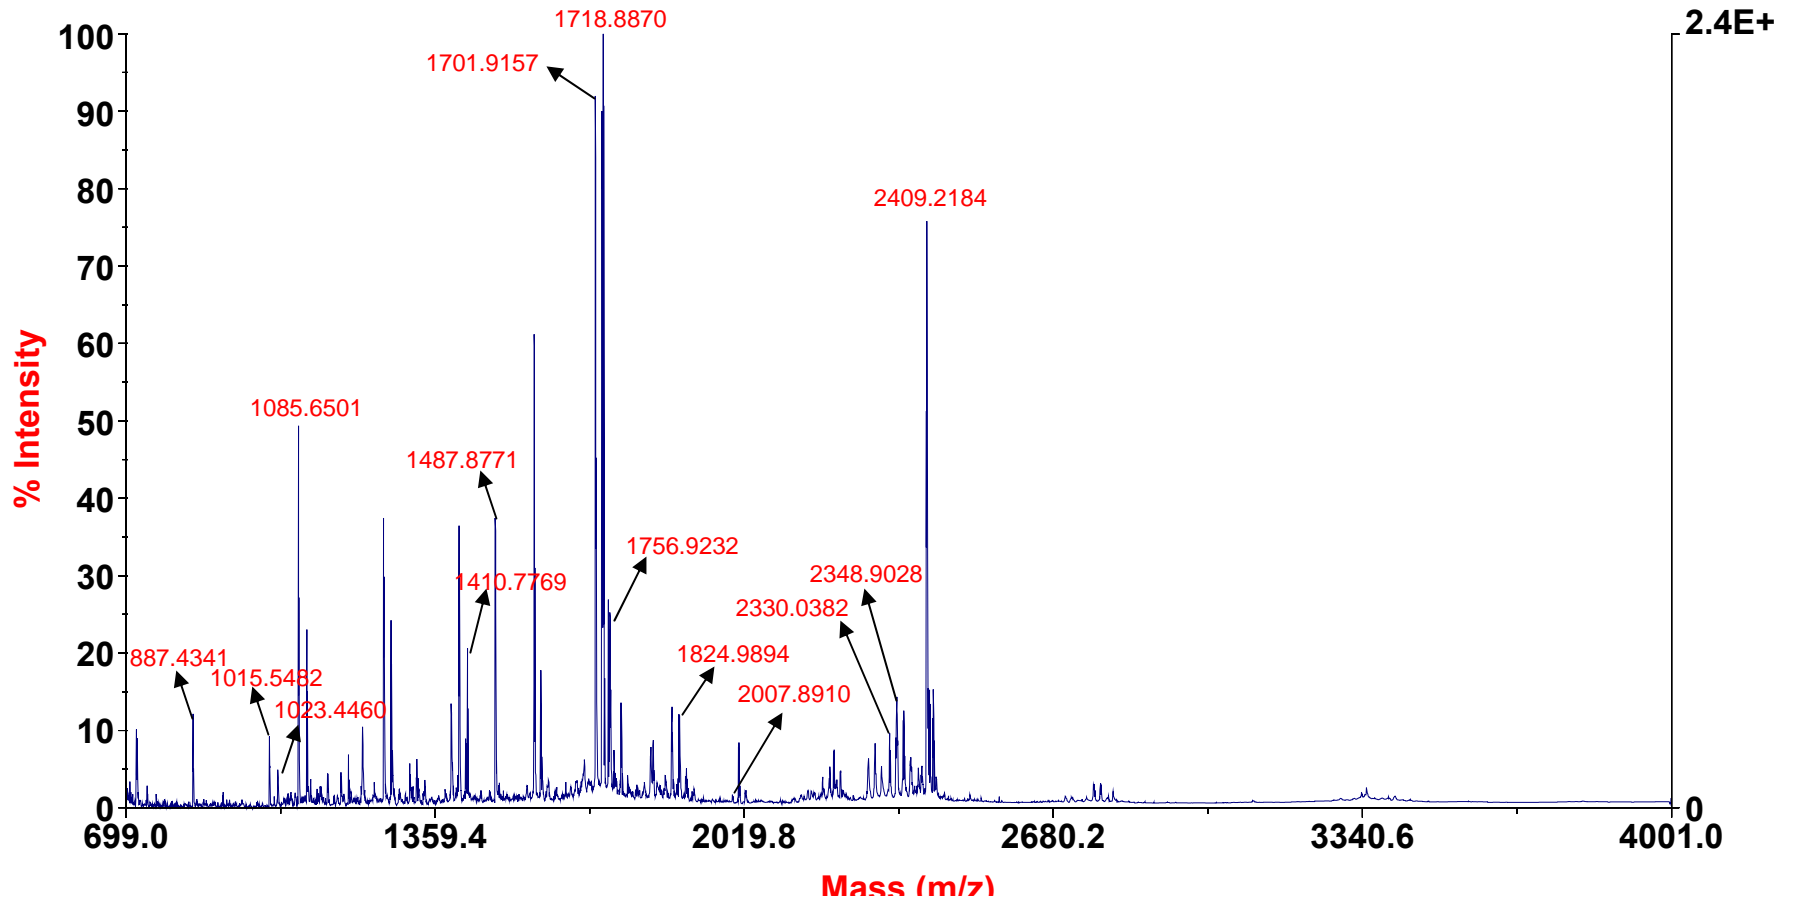

# IP-13: $\beta$ 5-tubulin/ TUBB

Voyager Spec #1=>NR(2.00)=>BC[BP = 954.3, 10682]

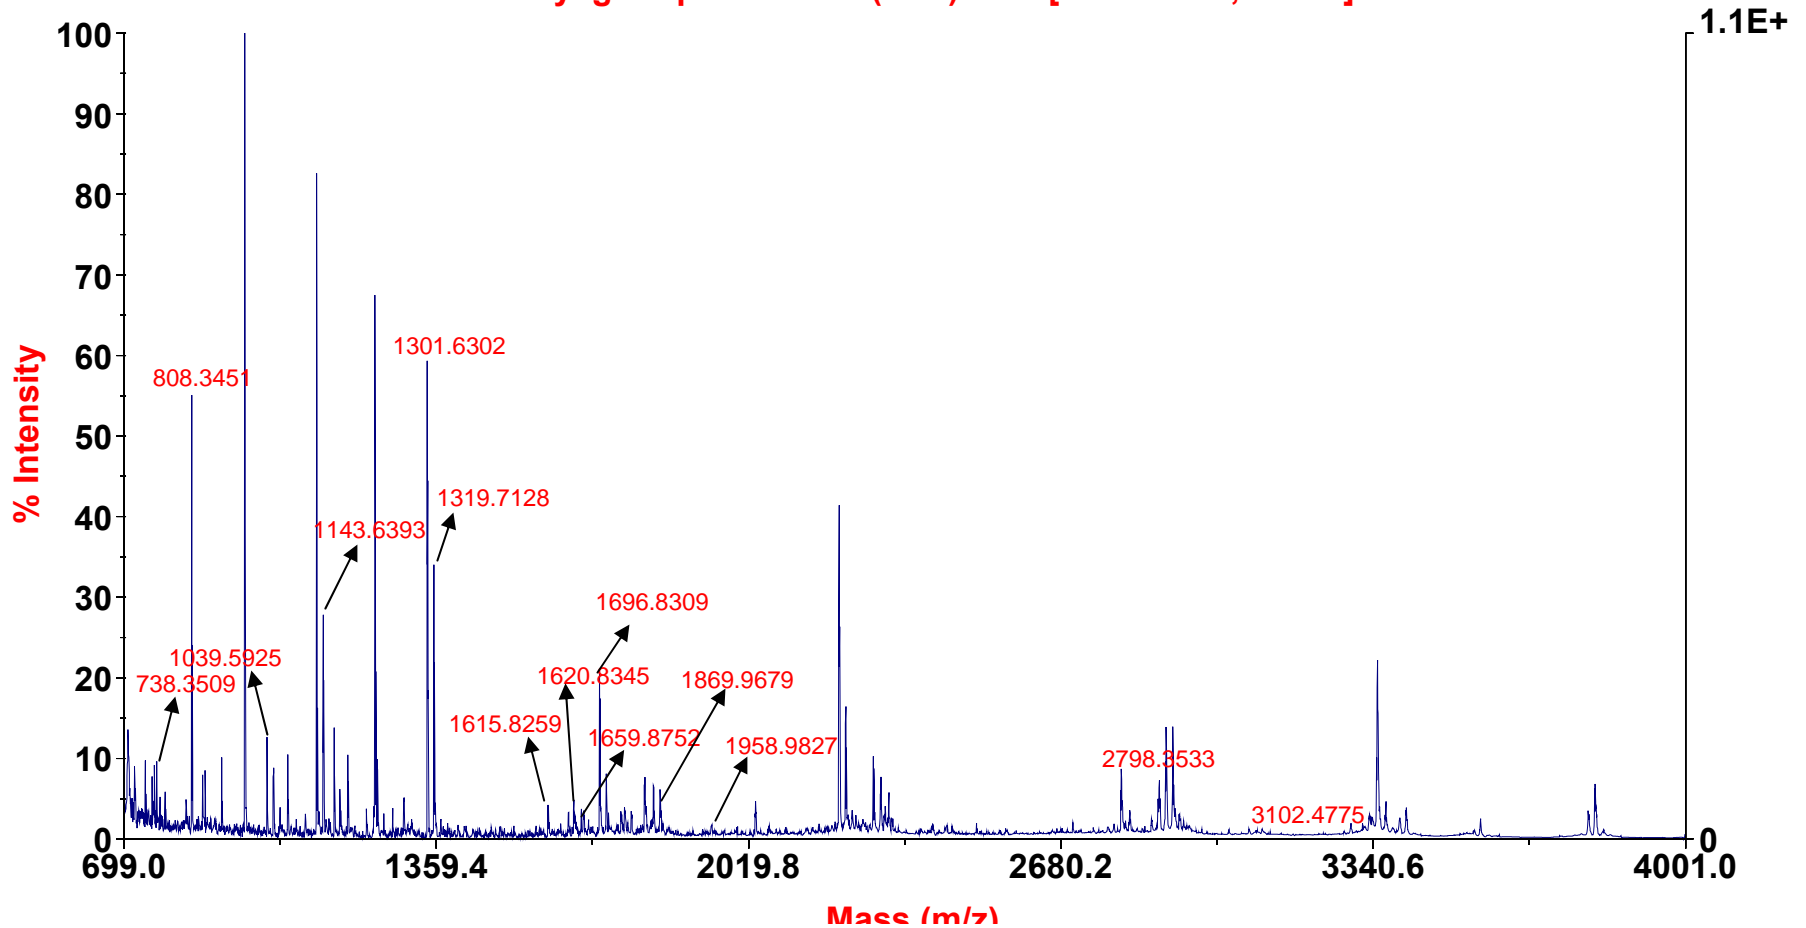

# IP-14: Vimentin/ VIM

Voyager Spec #1=>NR(2.00)=>BC[BP = 1639.1, 16848]

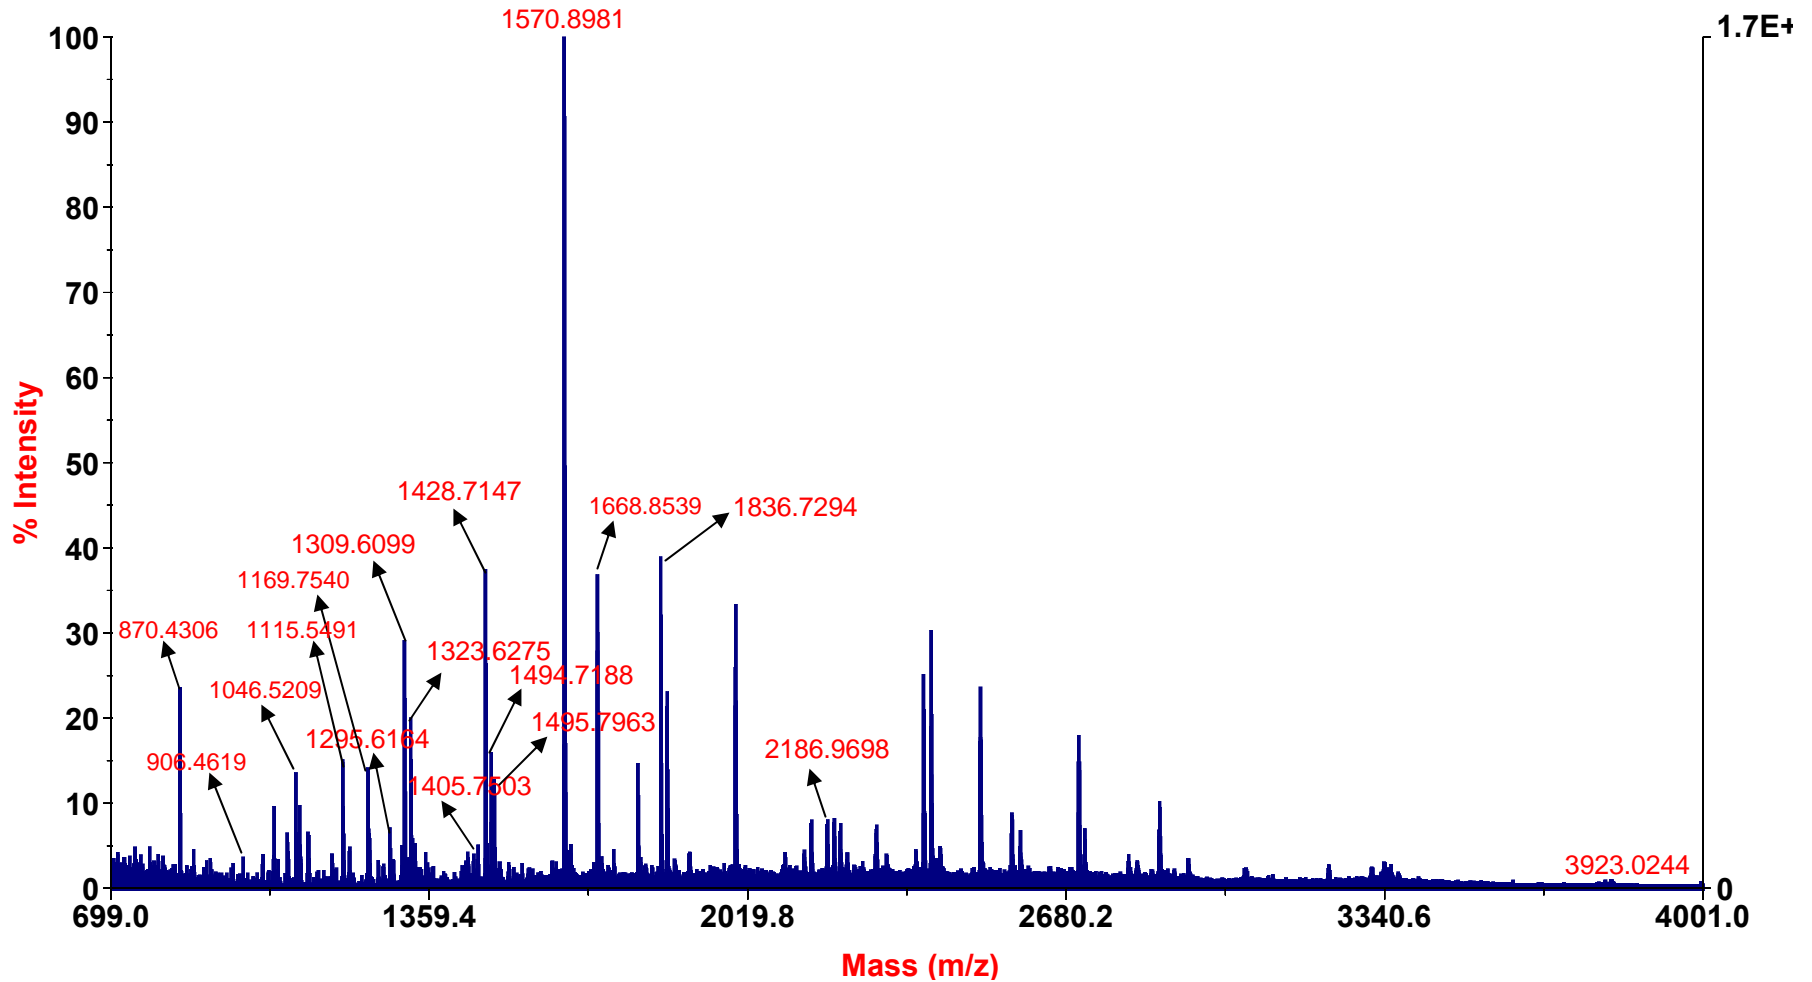

# IP-15: Cytokeratin 18/ KRT18

Voyager Spec #1=>NR(2.00)=>BC[BP = 842.9, 14959]

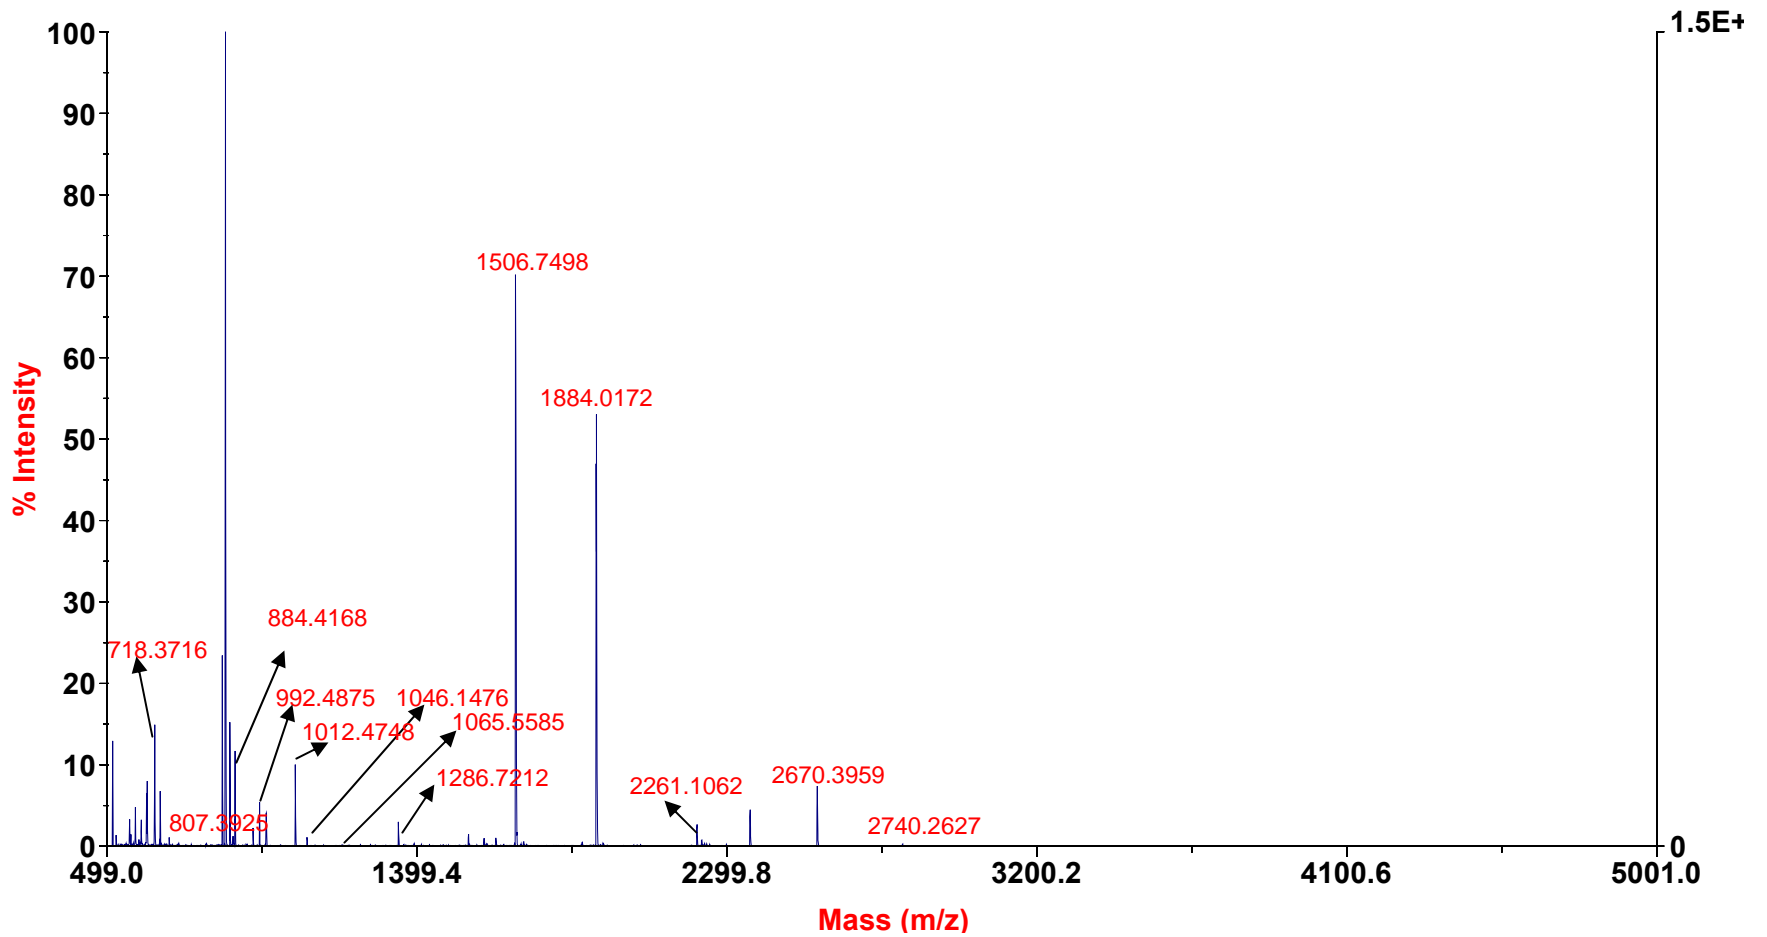



# IP-16: Heat shock 27kDa protein 1/ HSPB1

Voyager Spec #1=>NR(2.00)=>BC[BP = 615.4, 5904]

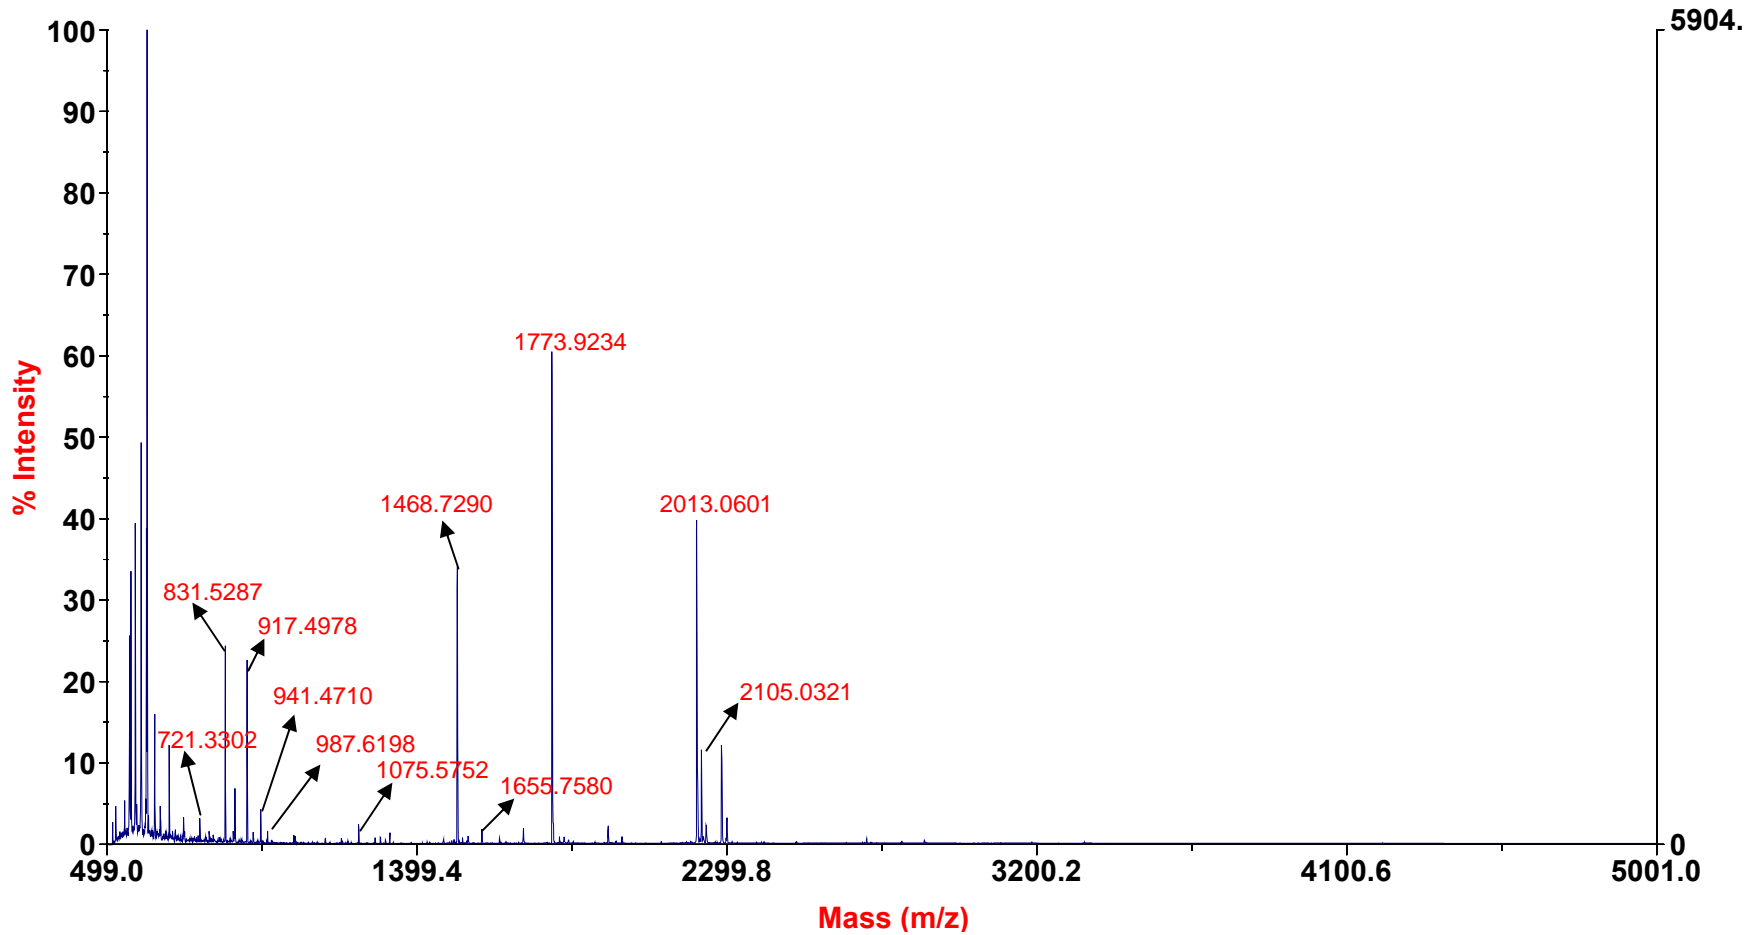

Supplement: M700303-MCP200_3.pdf [file M700303-MCP200_3.pdf]
