# Supplementary material
Source: PubMed Central journal article supplement (PMC2424193)
Supplement: M700303-MCP200_2.pdf [file M700303-MCP200_2.pdf]

**Table 1. Mass measured and the peptide assignments of identified proteins for “Chemical rescue of  $\Delta$ F508-CFTR mimics Genetic Repair in Cystic Fibrosis Bronchial Epithelial Cells”, Singh, O.V. et al.**

Data is processed peak lists of MALDI-TOF mass spectra that was collected and searched in MS-Fit search engine using SwissProt database (release date: 07.05.2006) as described in Supplemental material 4.4.

| Spot No. | Protein Description                    | Mass Measured | Mass accuracy (ppm)                     | Peptide assignments                   |
|----------|----------------------------------------|---------------|-----------------------------------------|---------------------------------------|
| IP-1     | Glucose regulated protein 94 kDa/ TRA1 | 1031.4909     | -7.3                                    | <a href="#">YFMAGSSR</a>              |
|          |                                        | 1139.5863     | 4.7                                     | <a href="#">LGVIEDHSNR</a>            |
|          |                                        | 1275.6226     | -16                                     | <a href="#">ELISNASDALDK</a>          |
|          |                                        | 1306.6560     | 4.2                                     | <a href="#">EFEPLLNWMK</a>            |
|          |                                        | 1485.7143     | -27                                     | <a href="#">GVVDSDDLPLNVS</a>         |
|          |                                        | 1513.7701     | -6.3                                    | <a href="#">NLLHVTDTGVMTR</a>         |
|          |                                        | 1525.7168     | -6.9                                    | <a href="#">EEASDYLELDTIK</a>         |
|          |                                        | 1595.7252     | 0.87                                    | <a href="#">VFITDDFHDMMPK</a>         |
|          |                                        | 1866.7046     | -11                                     | EESDDEAAVEEEEEK                       |
|          |                                        | 1878.9495     | 3.4                                     | <a href="#">YSQFINFPIYVWSSK</a>       |
|          |                                        | 2046.0101     | -25                                     | <a href="#">LISLTDENALSGNEELTVK</a>   |
|          |                                        | 2287.0263     | 1.5                                     | <a href="#">ESDDPMA YIHFTAEGEVTFK</a> |
|          |                                        | 2542.2211     | -28                                     | <a href="#">TVWDWELMNDIKPIWQRPSK</a>  |
|          | 2711.2090                              | 0.14          | <a href="#">HNNDTQHIWESDSNEFSVIADPR</a> |                                       |
| IP-2     | Heat shock protein 84 kDa / HSPCB      | 730.4407      | -7.7                                    | <a href="#">LSELLR</a>                |
|          |                                        | 891.4227      | -2.9                                    | <a href="#">FYEAFSK</a>               |
|          |                                        | 1160.5934     | 8.2                                     | <a href="#">SIYYITGESK</a>            |
|          |                                        | 1348.6604     | -3.4                                    | <a href="#">HFSVEGQLEFR</a>           |
|          |                                        | 1349.7144     | -15                                     | <a href="#">TLTLVDTGIGMTK</a>         |

|      |                                                      |           |      |                                                                                      |
|------|------------------------------------------------------|-----------|------|--------------------------------------------------------------------------------------|
|      |                                                      | 1416.6346 | -2.5 | <a href="#">EGLELPEDEEEK</a>                                                         |
|      |                                                      | 1494.6578 | 33   | <a href="#">IEDVGSDEEDDSGK</a>                                                       |
|      |                                                      | 1527.7498 | 3.6  | <a href="#">SLTNDWEDHLAVK</a>                                                        |
|      |                                                      | 1782.9457 | -2.6 | <a href="#">HLEINPDHPIVETLR</a>                                                      |
|      |                                                      | 1808.9081 | -28  | <a href="#">HSQFIGYPITLYLEK</a>                                                      |
|      |                                                      | 1847.7920 | -3.0 | <a href="#">NPDDITQEEYGEFYK</a>                                                      |
|      |                                                      | 2176.9151 | -14  | <a href="#">YHTSQSGDEMTSLSEYVSR</a>                                                  |
|      |                                                      | 2255.9558 | -1.6 | <a href="#">HNDDEQYAWESSAGGSFTVR</a>                                                 |
|      |                                                      | 2988.5912 | 20   | <a href="#">DLVLLFETALLSSGFSLEDPQTHSNR</a>                                           |
|      |                                                      | 3284.6046 | 1.0  | <a href="#">AFMEALQAGADISMIGQFGVGFYSAYLVAEK</a>                                      |
|      |                                                      | 3532.6148 | -8.7 | <a href="#">LGLGIDEDEVA</a> <a href="#">AEEPNA</a> <a href="#">AVPDEIPPLEGDEDASR</a> |
| IP-3 | <b>Glucose regulated protein 78 kDa (BiP)/ HSPA5</b> | 728.4695  | 3.4  | <a href="#">IQQLVK</a>                                                               |
|      |                                                      | 806.3743  | 3.1  | <a href="#">MVNDAEK</a>                                                              |
|      |                                                      | 903.4707  | -6.1 | <a href="#">VMEHFIK</a>                                                              |
|      |                                                      | 918.4718  | -7.2 | <a href="#">VLEDSDLK</a>                                                             |
|      |                                                      | 918.5027  | 26   | <a href="#">VLEDSDLK</a>                                                             |
|      |                                                      | 981.4857  | -3.7 | <a href="#">ETAEAYLGK</a>                                                            |
|      |                                                      | 986.5193  | 3.5  | <a href="#">LTPEEIER</a>                                                             |
|      |                                                      | 997.5073  | -11  | <a href="#">ALSSQHQAR</a>                                                            |
|      |                                                      | 1074.5578 | 3.2  | <a href="#">ITITNDQNR</a>                                                            |
|      |                                                      | 1191.6768 | 33   | <a href="#">VYEGERPLTK</a>                                                           |
|      |                                                      | 1313.6104 | -7.3 | <a href="#">FEELNMDLFR</a>                                                           |
|      |                                                      | 1316.6168 | -16  | <a href="#">NELESYAYSLK</a>                                                          |
|      |                                                      | 1316.6378 | 0.29 | <a href="#">NELESYAYSLK</a>                                                          |
|      |                                                      | 1397.7806 | -6.1 | <a href="#">ELEEIVQPIISK</a>                                                         |
|      |                                                      | 1460.7491 | -7.2 | <a href="#">SDIDEIVLVGGSTR</a>                                                       |
|      |                                                      | 1536.7968 | -1.0 | <a href="#">TFAPEEISAMVLTK</a>                                                       |

|      |                                             |           |       |                                             |
|------|---------------------------------------------|-----------|-------|---------------------------------------------|
|      |                                             | 1566.7298 | -32   | <a href="#">ITPSYVAFTPEGER</a>              |
|      |                                             | 1604.8672 | 1.5   | <a href="#">TKPYIQVDIGGGOTK</a>             |
|      |                                             | 1677.8098 | 0.83  | <a href="#">NQLTSNPENTVFDAK</a>             |
|      |                                             | 1818.8292 | -5.8  | <a href="#">LYGSAGPPPTGEEDTAEK</a>          |
|      |                                             | 1836.9308 | -1.9  | <a href="#">SQIFSTASDNQPTVTIK</a>           |
|      |                                             | 1887.9761 | 2.3   | <a href="#">VTHAVVTVPAYFNDAQR</a>           |
|      |                                             | 1934.0230 | 4.9   | <a href="#">DNHLLGTFDLTGIPPAPR</a>          |
|      |                                             | 1974.9059 | -1.3  | <a href="#">IEWLESHODADIEDFK</a>            |
|      |                                             | 1999.0808 | -2.8  | <a href="#">GVPQIEVTFEIDVNGILR</a>          |
|      |                                             | 2164.9910 | -0.76 | <a href="#">IEIESFYEGEDFSETLTR</a>          |
|      |                                             |           |       |                                             |
| IP-4 | <b>dnaK-type molecular chaperone/ HSPA1</b> | 704.3553  | -3.7  | <a href="#">DISQNK</a>                      |
|      |                                             | 723.4135  | 13    | <a href="#">VQVSYK</a>                      |
|      |                                             | 760.4179  | -3.4  | <a href="#">NSTIPTK</a>                     |
|      |                                             | 902.4819  | -1.8  | <a href="#">STLEPVEK</a>                    |
|      |                                             | 1109.5538 | -19   | <a href="#">LLQDFFNCR</a>                   |
|      |                                             | 1183.6479 | 0.31  | <a href="#">FELSGIPPAPR</a>                 |
|      |                                             | 1197.6939 | -1.4  | <a href="#">DAGVIAGLNVLR</a>                |
|      |                                             | 1465.8181 | 3.7   | <a href="#">AQIHDLVLVGGSTR</a>              |
|      |                                             | 1487.7112 | 6.3   | <a href="#">TTPSYVAFTDTER</a>               |
|      |                                             | 1614.8083 | -0.38 | <a href="#">AFYPEEISSMVLTK</a>              |
|      |                                             | 2304.1560 | 0.62  | <a href="#">SINPDEAVAYGAAVQAAILMGDK</a>     |
|      |                                             | 2530.3235 | 7.7   | <a href="#">GVPQIEVTFDIDANGILNVTATDK</a>    |
|      |                                             | 2786.3661 | 0.86  | <a href="#">QTQIFTTYSNQPGLIQVYEGER</a>      |
|      |                                             | 2981.4686 | 1.8   | <a href="#">TLSSSTQASLEIDSLFEGIDFYTSITR</a> |
|      |                                             |           |       |                                             |
| IP-5 | <b>Heat shock 70 kDa protein 2/ HSPA2</b>   | 848.4207  | 24    | <a href="#">QTVEDEK</a>                     |
|      |                                             | 1076.5097 | 7.8   | <a href="#">DEYEHKQK</a>                    |

... [1]  
... [2]

|  |           |       |                                                 |
|--|-----------|-------|-------------------------------------------------|
|  | 1111.5094 | 6.7   | <a href="#">YKSEDEANR</a>                       |
|  | 1175.6206 | -5.6  | <a href="#">ENKITITNDK</a>                      |
|  | 1190.5804 | -6.4  | <a href="#">MVSHLAEEFK</a>                      |
|  | 1253.6120 | -3.7  | <a href="#">FEELNADLFR</a>                      |
|  | 1270.5520 | -8.3  | <a href="#">FEDATVQSDMK</a>                     |
|  | 1309.6890 | 4.9   | <a href="#">MKEIAEAYLGGK</a>                    |
|  | 1315.6558 | 1.8   | <a href="#">NALESYTYNIK</a>                     |
|  | 1450.8152 | 6.5   | <a href="#">IQKLLQDFFNGK</a>                    |
|  | 1476.6797 | 3.0   | <a href="#">DDIDRMVQEAER</a>                    |
|  | 1480.7243 | -2.1  | <a href="#">ARFEELNADLFR</a>                    |
|  | 1487.7092 | 5.0   | <a href="#">TTPSYVAFTDTER</a>                   |
|  | 1646.9161 | 2.6   | <a href="#">VVSEGGKPKVQVEYK</a>                 |
|  | 1657.9291 | 3.3   | <a href="#">QATKDAGTITGLNVL</a>                 |
|  | 1787.9971 | 3.6   | <a href="#">IINEPTAAAIAYGLDKK</a>               |
|  | 1795.0406 | -2.0  | <a href="#">GQIQEIVLVGGSTRIPK</a>               |
|  | 1813.0117 | -3.7  | <a href="#">LDKGQIQEIVLVGGSTR</a>               |
|  | 1819.9169 | 2.4   | <a href="#">NQVAMNPTNTIFDAKR</a>                |
|  | 1887.9504 | -5.1  | <a href="#">TFFPEEISSMVLTKMK</a>                |
|  | 1938.0423 | -1.3  | <a href="#">DNNLLGKFDLTGIPPAPR</a>              |
|  | 1993.9295 | 3.2   | <a href="#">FEDATVQSDMKHWPFR</a>                |
|  | 2156.0839 | -1.7  | <a href="#">TTPSYVAFTDTERLIGDAAK</a>            |
|  | 2332.1915 | -2.4  | <a href="#">LIGDAAKNQVAMNPTNTIFDAK</a>          |
|  | 2697.3134 | 0.51  | <a href="#">VEIANDQGNRTTPSYVAFTDTER</a>         |
|  | 2873.4820 | -2.7  | <a href="#">GVPOIEVTFDIDANGILNVTAADKSTGK</a>    |
|  | 2935.4988 | 1.2   | <a href="#">EIAEAYLGGKVHSAVITVPAFENDSOR</a>     |
|  | 2983.4438 | 0.46  | <a href="#">TLSSSTQASIEIDSLYEGVDFYTSITR</a>     |
|  | 3139.5479 | 1.4   | <a href="#">RTLSSSTQASIEIDSLYEGVDFYTSITR</a>    |
|  | 3211.5232 | 0.45  | <a href="#">QTQFTTYSDNQSSVLVQVYEGERAMTK</a>     |
|  | 3236.7607 | -3.0  | <a href="#">SENVQDLLLLDVTPLSLGIETAGGVMTPLIK</a> |
|  | 3392.8718 | 0.098 | SENVQDLLLLDVTPLSLGIETAGGVMTPLIKR                |

|           |                                                 |                                        |       |                                       |
|-----------|-------------------------------------------------|----------------------------------------|-------|---------------------------------------|
| IP-6      | Heat shock 60 kDa<br>Protein 1/ HSPD1           | 743.4287                               | -2.2  | <a href="#">GIIDPTK</a>               |
|           |                                                 | 785.5121                               | -2.0  | <a href="#">IGIEIIK</a>               |
|           |                                                 | 833.3910                               | 0.49  | <a href="#">APGFGDNR</a>              |
|           |                                                 | 844.4951                               | -1.8  | <a href="#">VGEVIVTK</a>              |
|           |                                                 | 901.5353                               | -0.62 | <a href="#">LSDGVAVLK</a>             |
|           |                                                 | 912.5876                               | -0.69 | <a href="#">VGLQVVAVK</a>             |
|           |                                                 | 960.5209                               | 9.9   | <a href="#">VTDALNATR</a>             |
|           |                                                 | 1190.6075                              | -1.3  | <a href="#">EIGNIISDAMK</a>           |
|           |                                                 | 1215.6549                              | -3.0  | <a href="#">NAGVEGSLIVEK</a>          |
|           |                                                 | 1344.7158                              | -0.40 | <a href="#">TVIIEQSWGSPK</a>          |
|           |                                                 | 1389.7149                              | 6.8   | <a href="#">GYISPYFINTSK</a>          |
|           |                                                 | 1428.8130                              | -0.43 | <a href="#">GVMLAVDAVIAELK</a>        |
|           |                                                 | 1504.7263                              | -20   | <a href="#">TLNDELEIIEGMK</a>         |
|           |                                                 | 1674.6231                              | 1.4   | <a href="#">DPGMGAMGGMGGGMGGGMF</a>   |
|           |                                                 | 1919.0708                              | -0.33 | <a href="#">ISSIQSIVPALEIANHR</a>     |
|           |                                                 | 2038.0236                              | 0.19  | <a href="#">IQEIEQLDVTTSEYEK</a>      |
|           |                                                 | 2113.1495                              | 4.4   | <a href="#">ALMLQGVDLLADAVAVTMGPK</a> |
| 2365.3346 | 0.15                                            | <a href="#">KPLVIIAEDVDGEALSTLVLNR</a> |       |                                       |
| 2482.4114 | 3.8                                             | TALLDAAGVASLLTTAEVVVTEIPK              |       |                                       |
| IP-7      | Glucose regulated<br>protein 75 kDa/<br>MTHSP75 | 715.4151                               | -3.6  | <a href="#">LVGMPAK</a>               |
|           |                                                 | 764.3143                               | -14   | <a href="#">EMAGDNK</a>               |
|           |                                                 | 782.3365                               | 5.7   | <a href="#">YAEEDR</a>                |
|           |                                                 | 847.4190                               | 11    | <a href="#">DNMALQR</a>               |
|           |                                                 | 978.4590                               | 2.4   | <a href="#">AMQDAEVSK</a>             |
|           |                                                 | 993.4513                               | -1.6  | <a href="#">YDDPEVQK</a>              |
|           |                                                 | 1123.4662                              | -18   | <a href="#">EGSGSSGTGEQK</a>          |

... [5]

|      |                                          |           |      |                                        |
|------|------------------------------------------|-----------|------|----------------------------------------|
|      |                                          | 1231.6621 | -2.1 | <a href="#">QAASSLQOASLK</a>           |
|      |                                          | 1290.6810 | 0.29 | <a href="#">VQOTVQDLFGR</a>            |
|      |                                          | 1333.6282 | -8.0 | <a href="#">ETAENYLGHTAK</a>           |
|      |                                          | 1341.6142 | -3.4 | <a href="#">ASNGDAWVEAHGK</a>          |
|      |                                          | 1361.7403 | -1.9 | <a href="#">AQFEGIVTDLIR</a>           |
|      |                                          | 1446.7520 | -7.4 | <a href="#">SDIGEVILVGGMTR</a>         |
|      |                                          | 1450.7162 | -1.1 | <a href="#">TTPSVVAFTADGER</a>         |
|      |                                          | 1473.7917 | 0.27 | <a href="#">EQQIVIQSSGGLSK</a>         |
|      |                                          | 1553.8296 | -6.8 | <a href="#">LYSPSQIGAFVLMK</a>         |
|      |                                          | 1568.7713 | 0.26 | <a href="#">QAVTNPNTFYATK</a>          |
|      |                                          | 1592.9552 | 1.5  | <a href="#">LLGQFTLIGIPPAPR</a>        |
|      |                                          | 1645.8595 | -13  | <a href="#">VINEPTAAALAYGLDK</a>       |
|      |                                          | 1694.8426 | -4.5 | <a href="#">NAVITVPAYFNSQR</a>         |
|      |                                          | 1808.9124 | 5.2  | <a href="#">SQVFSTAADGOTOVEIK</a>      |
|      |                                          | 1856.9088 | 1.3  | <a href="#">VEAVNMAEGIIHDTETK</a>      |
|      |                                          | 2055.9217 | -20  | <a href="#">STNGDTFLGGEDFDQALLR</a>    |
|      |                                          | 2251.2280 | 2.4  | <a href="#">VIAVYDLGGGTFDISILEIQK</a>  |
|      |                                          | 2309.2535 | 17   | <a href="#">GVPQIEVTFDIDANGIVHWSAK</a> |
|      |                                          |           |      |                                        |
| IP-8 | Heat shock 70 kDa protein 1-HOM/ HSP-HOM | 804.4451  | -2.0 | <a href="#">ITITNDK</a>                |
|      |                                          | 805.4104  | -3.2 | <a href="#">MVLDAEK</a>                |
|      |                                          | 872.4773  | 5.0  | <a href="#">GTLEPVEK</a>               |
|      |                                          | 933.4807  | -9.2 | <a href="#">SVVSDEGLK</a>              |
|      |                                          | 1125.5617 | -6.7 | <a href="#">LLODYFNDR</a>              |
|      |                                          | 1183.6369 | -9.0 | <a href="#">FDLTGIPPAPR</a>            |
|      |                                          | 1197.6909 | -3.9 | <a href="#">DAGVIAGLNVLRL</a>          |
|      |                                          | 1234.6166 | -25  | <a href="#">LVSHFVEEFK</a>             |
|      |                                          | 1263.6048 | 0.36 | <a href="#">FNDPVVQADMK</a>            |

|      |                                                   |           |       |                                       |
|------|---------------------------------------------------|-----------|-------|---------------------------------------|
|      |                                                   | 1266.7564 | 31    | <a href="#">IHDIVLVGGSTR</a>          |
|      |                                                   | 1287.6098 | 4.2   | <a href="#">NALESYAFNMK</a>           |
|      |                                                   | 1487.7092 | 5.0   | <a href="#">TTPSYVAFTDTER</a>         |
|      |                                                   | 1614.8483 | 24    | <a href="#">AFYPEEISSMVLTK</a>        |
|      |                                                   | 1675.7386 | 4.4   | <a href="#">ATAGDTHLGGEDFDNR</a>      |
|      |                                                   | 1676.8261 | 12    | <a href="#">NQVAMNPQNTVFDAK</a>       |
| IP-9 | <b>Glucose regulated protein 58 kDa/ PDIA3</b>    | 782.3480  | -12   | <a href="#">TEEEFK</a>                |
|      |                                                   | 782.3556  | -2.1  | <a href="#">GSNYWR</a>                |
|      |                                                   | 787.4197  | 12    | <a href="#">FLDAGHK</a>               |
|      |                                                   | 877.4880  | -1.8  | <a href="#">LNFAVASR</a>              |
|      |                                                   | 939.4772  | -1.6  | <a href="#">TVAYTEQK</a>              |
|      |                                                   | 995.5532  | -11   | <a href="#">QAGPASVPLR</a>            |
|      |                                                   | 1040.5724 | -1.6  | <a href="#">TADGIVSHLK</a>            |
|      |                                                   | 1084.5573 | -9.8  | <a href="#">YGVSGYPTLK</a>            |
|      |                                                   | 1172.5304 | -9.1  | <a href="#">FVMQEEFSR</a>             |
|      |                                                   | 1191.6014 | 0.36  | <a href="#">LAPEYEAAATR</a>           |
|      |                                                   | 1236.5117 | -1.3  | <a href="#">DGEEAGAYDGPR</a>          |
|      |                                                   | 1341.6737 | -7.9  | <a href="#">GFPTIYFSPANK</a>          |
|      |                                                   | 1359.6569 | -1.2  | <a href="#">FLQDYFDGNLK</a>           |
|      |                                                   | 1368.6631 | -1.2  | <a href="#">SEPIPESNDGPVK</a>         |
|      |                                                   | 1370.6840 | -8.5  | <a href="#">ELSDFISYLQR</a>           |
|      |                                                   | 1619.7819 | -1.6  | <a href="#">DLLIAYYDVDYEK</a>         |
|      |                                                   | 1664.7574 | -0.97 | <a href="#">MDATANDVPSPYEVR</a>       |
|      |                                                   | 1832.9124 | 5.1   | <a href="#">VVVAENFDEIVNNENK</a>      |
|      |                                                   | 2348.0727 | 0.18  | <a href="#">DASIVGFFDDSFSEAHSEFLK</a> |
| IP-  | <b>Heat shock cognate protein 8 isoform 1, 71</b> | 705.3453  |       | <a href="#">DISENK</a>                |

|       |                   |           |       |                                                       |
|-------|-------------------|-----------|-------|-------------------------------------------------------|
| 10    | <b>kDa/ HSPA8</b> |           | 4.8   |                                                       |
|       |                   | 765.4101  | -6.0  | <a href="#">VQVEYK</a>                                |
|       |                   | 774.4306  | -7.2  | <a href="#">NTTIPTK</a>                               |
|       |                   | 791.3701  | -11   | <a href="#">ATVEDEK</a>                               |
|       |                   | 804.4161  | -38   | <a href="#">ITITNDK</a>                               |
|       |                   | 858.4557  | -1.8  | <a href="#">GTLDPVEK</a>                              |
|       |                   | 993.5551  | 30    | <a href="#">EIAEAYLGK</a>                             |
|       |                   | 1074.4950 | 8.7   | <a href="#">EEFEHQOK</a>                              |
|       |                   | 1081.5676 | -0.57 | <a href="#">LLQDFENGK</a>                             |
|       |                   | 1197.6676 | 3.7   | <a href="#">FELTGIPPAPR</a>                           |
|       |                   | 1199.6942 | 16    | <a href="#">DAGTIAGLNVLR</a>                          |
|       |                   | 1228.6230 | -4.5  | <a href="#">VEIANDQGNR</a>                            |
|       |                   | 1235.6201 | -3.7  | <a href="#">MVNHFAEFK</a>                             |
|       |                   | 1253.6460 | 23    | <a href="#">FEELNADLFR</a>                            |
|       |                   | 1254.5680 | 0.30  | <a href="#">FDDAVVQSDMK</a>                           |
|       |                   | 1303.5937 | -4.3  | <a href="#">NSLESYAFNMK</a>                           |
|       |                   | 1481.8170 | 6.3   | <a href="#">SQIHDIVLVGGSTR</a>                        |
|       |                   | 1487.7082 | 4.3   | <a href="#">TTPSYVAFTDTER</a>                         |
|       |                   | 2260.1465 | 0.17  | <a href="#">SINPDEAVAYGAAVQAAILSGDK</a>               |
|       |                   | 2514.3385 | 12    | <a href="#">GVPQIEVTFDIDANGILNVSAVDK</a>              |
|       |                   | 2774.3257 | -0.59 | <a href="#">QTQFTTYSNQPGLIQVYEGER</a>                 |
|       |                   | 2997.4175 | -14   | <a href="#">TLSSSTQASIEIDSLYEGIDFYTSITR</a>           |
|       |                   | 3346.4940 | -1.7  | <a href="#">LYQSAGGMPGGMPGGFPGGGAPPSGGASSGPTIEEVD</a> |
| IP-11 | <b>BAG-3</b>      | 801.4706  | -2.0  | <a href="#">VEAILEK</a>                               |
|       |                   | 990.4629  | -1.6  | <a href="#">TTTWNDPR</a>                              |
|       |                   | 1151.6195 | 8.2   | <a href="#">DPLPPGWEIK</a>                            |
|       |                   | 1302.6640 | -1.2  | <a href="#">YLMIEEYLTK</a>                            |
|       |                   | 1413.7119 | -7.5  | <a href="#">ELLALDSVDPEGR</a>                         |

... [6]



|       |                                                          |           |      |                                       |
|-------|----------------------------------------------------------|-----------|------|---------------------------------------|
|       |                                                          | 1481.7485 | -1.1 | <a href="#">IQGDDWEPRPLR</a>          |
|       |                                                          | 1915.9185 | 4.9  | <a href="#">IDPQTGWPFVVDHNSR</a>      |
| IP-12 | <b><math>\alpha</math>-tubulin isoform 1/<br/>TUBA1B</b> | 775.4057  | -5.9 | <a href="#">GHYTIGK</a>               |
|       |                                                          | 781.4190  | 12   | <a href="#">LSVDYGK</a>               |
|       |                                                          | 887.4341  | 0.45 | <a href="#">FDLMYAK</a>               |
|       |                                                          | 906.4277  | 3.8  | <a href="#">EDMAALEK</a>              |
|       |                                                          | 1015.5482 | -30  | <a href="#">DVNAAIATIK</a>            |
|       |                                                          | 1023.4460 | -3.5 | <a href="#">EDAANNYAR</a>             |
|       |                                                          | 1085.6501 | 27   | <a href="#">EIIDLVLDR</a>             |
|       |                                                          | 1410.7769 | 1.7  | <a href="#">QLFHPEQLITGK</a>          |
|       |                                                          | 1487.8771 | -1.8 | <a href="#">LISQIVSSITASLR</a>        |
|       |                                                          | 1701.9157 | 5.5  | <a href="#">AVFVDLEPTVIDEVR</a>       |
|       |                                                          | 1718.8870 | 2.6  | <a href="#">NLDIERPTYTNLNR</a>        |
|       |                                                          | 1756.9232 | -23  | <a href="#">IHFPLATYAPVISA EK</a>     |
|       |                                                          | 1824.9894 | 1.9  | <a href="#">VGINYQPPTVVPGGDLAK</a>    |
|       |                                                          | 2007.8910 | -1.3 | <a href="#">TIGGGDDSFNTFFSETGAGK</a>  |
|       |                                                          | 2330.0382 | 8.3  | <a href="#">AFVHWYVGEGMEEGEFSEAR</a>  |
|       |                                                          | 2348.9028 | -1.1 | <a href="#">DYEEVGVDSEGE GEEEGEEY</a> |
|       |                                                          | 2409.2184 | 3.9  | <a href="#">FDGALNVDLTEFQTNLVPYPR</a> |
| IP-13 | <b><math>\beta</math> 5-tubulin/ TUBB</b>                | 738.3509  | -3.5 | <a href="#">GSQQYR</a>                |
|       |                                                          | 808.3451  | -3.2 | <a href="#">EEYPDR</a>                |
|       |                                                          | 1039.5925 | -1.5 | <a href="#">YLTVA AVER</a>            |
|       |                                                          | 1143.6393 | 3.9  | <a href="#">LAVNMVPEPR</a>            |
|       |                                                          | 1301.6302 | -5.8 | <a href="#">ISVYYNEATGGK</a>          |

... [7]  
... [8]

|       |               |           |       |                                            |
|-------|---------------|-----------|-------|--------------------------------------------|
|       |               | 1319.7128 | 7.2   | <a href="#">IMNTFSVVPSPK</a>               |
|       |               | 1446.6803 | -6.6  | <a href="#">EVDEQMLNVQNK</a>               |
|       |               | 1615.8259 | -6.6  | <a href="#">AILVDLEPGTMDSVR</a>            |
|       |               | 1620.8345 | -0.97 | <a href="#">LHFFMPGFAPLTSR</a>             |
|       |               | 1659.8752 | -12   | <a href="#">ALTVPELTQQVFDAK</a>            |
|       |               | 1696.8309 | -1.5  | <a href="#">NSSYFVEWIPNNVK</a>             |
|       |               | 1869.9679 | -5.6  | <a href="#">MAVTFIGNSTAIQELFK</a>          |
|       |               | 1958.9827 | 0.18  | <a href="#">GHYTEGAELVDSVLDVVR</a>         |
|       |               | 2798.3533 | 3.4   | <a href="#">SGPFGQIFRPDNFVFGQSGAGNNWAK</a> |
|       |               | 3102.4775 | 22    | <a href="#">FWEVISDEHGIDPTGTYHGSDQLDR</a>  |
|       |               |           |       |                                            |
| IP-14 | Vimentin/ VIM | 701.3950  | 0.55  | <a href="#">SSVPGVR</a>                    |
|       |               | 870.4306  | -6.4  | <a href="#">FANYIDK</a>                    |
|       |               | 905.4023  | -34   | <a href="#">GTNESLER</a>                   |
|       |               | 906.4619  | -7.3  | <a href="#">FLEQQNK</a>                    |
|       |               | 912.4027  | -3.9  | <a href="#">QESTEYR</a>                    |
|       |               | 914.4558  | -2.8  | <a href="#">SYVTTSTR</a>                   |
|       |               | 1023.5155 | 4.3   | <a href="#">QQYESVAAK</a>                  |
|       |               | 1046.5209 | -9.1  | <a href="#">LOBEMLQR</a>                   |
|       |               | 1060.5769 | 47    | <a href="#">KLEGEESR</a>                   |
|       |               | 1076.5041 | -0.50 | <a href="#">DNLAEDIMR</a>                  |
|       |               | 1115.5491 | -18   | <a href="#">VELQELNDR</a>                  |
|       |               | 1121.5897 | 4.8   | <a href="#">EYQDLLNVK</a>                  |
|       |               | 1169.7540 | 34    | <a href="#">ILLAELEOLK</a>                 |
|       |               | 1254.5680 | 0.30  | <a href="#">LGDLYEEEMR</a>                 |
|       |               | 1295.6164 | -39   | <a href="#">MALDIEIATYR</a>                |
|       |               | 1309.6099 | 2.6   | <a href="#">NLQEAEWYK</a>                  |
|       |               | 1323.6275 | 7.1   | <a href="#">EEAENTLQSF</a>                 |

|       |                          |           |            |                                            |
|-------|--------------------------|-----------|------------|--------------------------------------------|
|       |                          | 1405.7503 | -5.4       | <a href="#">VESLQEEIAFLK</a>               |
|       |                          | 1428.7147 | 1.7        | <a href="#">SLYASSPGGVYATR</a>             |
|       |                          | 1494.7188 | 4.3        | <a href="#">MFGGPGTASRPSSSR</a>            |
|       |                          | 1495.7963 | 6.3        | <a href="#">TYSLGSALRPSTSR</a>             |
|       |                          | 1570.8981 | 1.5        | <a href="#">ISLPLPNFSSLNLR</a>             |
|       |                          | 1668.8539 | 38 1Met-ox | LGDLYEEEMRELR                              |
|       |                          | 1836.7294 | -38        | <a href="#">DGOVINETSQHDDLE</a>            |
|       |                          | 2186.9698 | 1.5        | <a href="#">EMEENFAVEAANYQDTIGR</a>        |
|       |                          | 3923.0244 | 2.4        | LHEEEIQELQAQIQEQHVQIDVDVSKPDLTAALR         |
|       |                          |           |            |                                            |
| IP-15 | Cytokeratin 18/<br>KRT18 | 718.3716  | -29        | <a href="#">IMADIR</a>                     |
|       |                          | 807.3925  | -9.4       | <a href="#">LAADDFR</a>                    |
|       |                          | 884.4168  | 6.1        | <a href="#">NHEEEVK</a>                    |
|       |                          | 965.4667  | -2.6       | <a href="#">AQYDELAR</a>                   |
|       |                          | 975.4230  | -31        | <a href="#">STFSTNYR</a>                   |
|       |                          | 992.4875  | -2.5       | <a href="#">VVSETNDTK</a>                  |
|       |                          | 1012.4748 | -2.5       | <a href="#">YETELAMR</a>                   |
|       |                          | 1012.4748 | -31        | <a href="#">KNHEEEVK</a>                   |
|       |                          | 1046.5176 | -29        | <a href="#">VIDDTNITR</a>                  |
|       |                          | 1065.5585 | 0.42       | <a href="#">LEAEIATYR</a>                  |
|       |                          | 1267.6289 | -8.4       | <a href="#">QSVENDIHGLR</a>                |
|       |                          | 1286.7212 | 0.34       | <a href="#">LQLETEIEALK</a>                |
|       |                          | 1506.7498 | 1.6        | <a href="#">TVQSLEIDLDSMR</a>              |
|       |                          | 1884.0172 | 5.0        | <a href="#">GLOAQIASSGLTVEVDAPK</a>        |
|       |                          | 2261.1062 | 3.4        | <a href="#">YETELAMROSVENDIHGLR</a>        |
|       |                          | 2261.1062 | 1.9        | <a href="#">GGMGSGGLATGIAGGLAGMGGIQNEK</a> |
|       |                          | 2670.3959 | 1.3        | <a href="#">YALQMEQLNGILLHLESELAQTR</a>    |
|       |                          | 2740.2627 | 0.13       | LLEDGEDFNLDALDSSNSMQTIQK                   |

... [9]

|       |                                   |           |      |                                    |
|-------|-----------------------------------|-----------|------|------------------------------------|
| IP-16 | Heat shock 27kDa protein 1/ HSPB1 | 721.3302  | -9.2 | <a href="#">SDETAAK</a>            |
|       |                                   | 831.5287  | 23   | <a href="#">VPFSLLR</a>            |
|       |                                   | 917.4978  | 3.7  | <a href="#">DGVVEITGK</a>          |
|       |                                   | 941.4710  | 0.45 | <a href="#">AQLGGPEAAK</a>         |
|       |                                   | 987.6198  | 9.6  | <a href="#">RVPFSLLR</a>           |
|       |                                   | 1075.5752 | 0.41 | <a href="#">QLSSGVSEIR</a>         |
|       |                                   | 1104.5168 | 8.5  | <a href="#">QDEHGYISR</a>          |
|       |                                   | 1146.6394 | 2.1  | <a href="#">TKDGVVEITGK</a>        |
|       |                                   | 1163.6217 | 0.33 | <a href="#">LFDQAFGLPR</a>         |
|       |                                   | 1468.7290 | -7.2 | <a href="#">DGVVEITGKHEER</a>      |
|       |                                   | 1655.7580 | 3.2  | <a href="#">HEERQDEHGYISR</a>      |
|       |                                   | 1773.9234 | -12  | <a href="#">VPFSLLRGPSWDPER</a>    |
|       |                                   | 2013.0601 | -2.8 | <a href="#">VSLDVNHFAPDELTVKTK</a> |
|       |                                   | 2105.0321 | -1.7 | <a href="#">DWYPHSRLFDQAFGLPR</a>  |
|       |                                   |           |      |                                    |

... [10]

|                       |         |                    |
|-----------------------|---------|--------------------|
| Page 3: [1] Deleted   | osingh1 | 12/7/2007 8:09 AM  |
| 1659.8152             | -49     | IINEPTAAAIAAYGLDK  |
| Page 3: [2] Deleted   | osingh1 | 12/7/2007 8:10 AM  |
| 1091.4212             | -46     | SEDEANRDR          |
| Page 4: [3] Deleted   | osingh1 | 12/7/2007 8:10 AM  |
| 1456.8818             | 48      | GQIQEIVLVGGSTR     |
| Page 4: [4] Deleted   | osingh1 | 12/7/2007 8:11 AM  |
| 1659.8252             | -43     | IINEPTAAAIAAYGLDK  |
| Page 5: [5] Deleted   | osingh1 | 12/7/2007 8:11 AM  |
| 1233.5457             | -41     | VGGTSDVEVNEK       |
| Page 8: [6] Deleted   | osingh1 | 12/7/2007 8:12 AM  |
| 1981.9177             | -41     | TVTNAVVTVPAYFNDSQR |
| Page 9: [7] Deleted   | osingh1 | 12/7/2007 8:12 AM  |
| 1130.5352             | -54     | FPGQLNADLR         |
| Page 9: [8] Deleted   | osingh1 | 12/7/2007 8:12 AM  |
| 1229.5383             | -49     | ISEQFTAMFR         |
| Page 11: [9] Deleted  | osingh1 | 12/7/2007 8:13 AM  |
| 848.4508              | 46      | SLETENR            |
| Page 12: [10] Deleted | osingh1 | 12/7/2007 8:13 AM  |
| 960.4722              | 41      | DWYPHSR            |
